# Supplementary material for: The pan-genome and local adaptation of Arabidopsis thaliana
Source: PubMed Central journal article supplement (PMC10558531; doi:10.1038/s41467-023-42029-4), 2023-10-06
Supplement: 41467_2023_42029_MOESM1_ESM.pdf [file 41467_2023_42029_MOESM1_ESM.pdf]

# **The pan-genome and local adaptation of *Arabidopsis thaliana***

Kang *et al.*

**Supplementary Table 1. Summary of the 32 *Arabidopsis thaliana* ecotypes in this study.**

|            | <b>Name</b>   | <b>CS Number</b> | <b>Country</b>              | <b>Latitude</b> | <b>Longitude</b> | <b>Altitude</b> |
|------------|---------------|------------------|-----------------------------|-----------------|------------------|-----------------|
|            | Yilong-0      | CS79063          | China                       | 31.56402        | 106.7062         | 506             |
|            | Bor-1         | CS22590          | Czech Republic              | 49.4013         | 16.2326          | 697             |
|            | Cdm-0         | CS76410          | Spain                       | 39.73           | -5.74            | 157             |
|            | Got-22        | CS22609          | Germany                     | 51.5338         | 9.9355           | 310             |
|            | Kondara       | CS22651          | Tajikistan                  | 38.48           | 68.49            | 641             |
|            | Kz-9          | CS22607          | Kazakhstan                  | 49.5            | 73.1             | 283             |
|            | LL-0          | CS22650          | Spain                       | 41.59           | 2.49             | 329             |
|            | Mammo-1       | CS76365          | Italy                       | 38.36           | 16.23            | 146             |
|            | Ms-0          | CS22655          | Russian<br>Federation       | 55.7522         | 37.6322          | 2,306           |
|            | Pra-6         | CS76416          | Spain                       | 41.05           | -3.54            | 440             |
|            | Pu2-23        | CS22593          | Czech Republic              | 49.42           | 16.36            | 2,698           |
|            | Sij-1         | CS76379          | Uzbekistan                  | 41.45           | 70.05            | 666             |
|            | Sorbo         | CS22653          | Tajikistan                  | 38.35           | 68.48            | 350             |
| Non-Relict | TueSB30-3     | CS76403          | Germany                     | 48.53           | 9.06             | 165             |
|            | Hs-0          | CS76145          | Germany                     | 52.24           | 9.44             | 42              |
|            | LI-OF-095     | CS76165          | United States<br>of America | 40.9447         | -72.8615         | 148             |
|            | Per-1         | CS76210          | Russian<br>Federation       | 58              | 56.3167          | 148             |
|            | St-0          | CS76231          | Sweden                      | 59              | 18               | 25              |
|            | Kelsterbach-2 | CS28382          | Germany                     | 50.0667         | 8.5333           | 93              |
|            | Nz-1          | CS28578          | New Zealand                 | -37.7871        | 175.283          | 48              |
|            | Dra-2         | CS28214          | Czech Republic              | 49.4167         | 16.2667          | 536             |
|            | Belmonte-4-94 | CS76095          | Italy                       | 42.1167         | 12.4833          | 218             |
|            | Sha / Ara-1   | CS76382          | Afghanistan                 | 37.29           | 71.3             | 4,058           |
|            | Sij-2         | CS76380          | Uzbekistan                  | 41.45           | 70.05            | 2,698           |
|            | Col-0         | CS76778          | United States<br>of America | 38.3            | -92.3            | 182             |
|            | AH-7          | -                | China                       | 31.19968        | 115.8067         | 518             |
| Relict     | Tibet-0       | CS79062          | China                       | 29.68976        | 91.1861          | 4,317           |
|            | Etna-2        | CS76487          | Italy                       | 37.69           | 14.98            | 1,660           |
|            | Meh-0         | CS799916         | Morocco                     | 33.9561         | -4.0515          | 1,320           |
|            | Elk-1         | CS799922         | Morocco                     | 32.5352         | -6.015           | 1,231           |
|            | Ket-10        | CS799912         | Morocco                     | 34.9608         | -4.6661          | 1,607           |
|            | Arb-0         | CS799926         | Morocco                     | 31.4199         | -7.5262          | 1,097           |

**Supplementary Table 2. Summary of the 32 *Arabidopsis thaliana* ecotypes DNA sequencing data.**

| <b>Name</b>   | <b>Number of HiFi reads</b> | <b>Total data (Gb)</b> | <b>Reads length N50 (bp)</b> | <b>Mean reads length</b> | <b>Sequence coverage<sup>1</sup> (X)</b> |
|---------------|-----------------------------|------------------------|------------------------------|--------------------------|------------------------------------------|
| Yilong-0      | 363,459                     | 6.65                   | 19,035                       | 18,295                   | 48.29                                    |
| Bor-1         | 299,373                     | 3.95                   | 15,642                       | 13,177                   | 28.69                                    |
| Cdm-0         | 164,271                     | 2.62                   | 16,862                       | 15,934                   | 19.03                                    |
| Got-22        | 345,355                     | 4.43                   | 14,685                       | 12,825                   | 32.17                                    |
| Kondara       | 341,635                     | 5.10                   | 15,053                       | 14,916                   | 37.04                                    |
| Kz-9          | 326,232                     | 4.18                   | 14,288                       | 12,806                   | 30.36                                    |
| LL-0          | 352,220                     | 4.90                   | 15,573                       | 13,912                   | 35.58                                    |
| Mammo-1       | 173,628                     | 2.33                   | 15,451                       | 13,443                   | 16.92                                    |
| Ms-0          | 389,833                     | 5.38                   | 14,790                       | 13,800                   | 39.07                                    |
| Pra-6         | 240,797                     | 3.44                   | 14,379                       | 14,271                   | 24.98                                    |
| Pu2-23        | 352,556                     | 5.14                   | 14,834                       | 14,582                   | 37.33                                    |
| Sij-1         | 296,021                     | 3.89                   | 15,104                       | 13,154                   | 28.25                                    |
| Sorbo         | 558,573                     | 4.61                   | 9,787                        | 8,261                    | 33.48                                    |
| TueSB30-3     | 499,105                     | 8.22                   | 16,966                       | 16,465                   | 59.69                                    |
| Hs-0          | 280,189                     | 3.63                   | 15,007                       | 12,955                   | 26.36                                    |
| LI-OF-095     | 317,489                     | 3.81                   | 14,078                       | 12,014                   | 27.67                                    |
| Per-1         | 301,006                     | 4.13                   | 15,340                       | 13,714                   | 29.99                                    |
| St-0          | 194,285                     | 3.07                   | 16,515                       | 15,805                   | 22.29                                    |
| Kelsterbach-2 | 424,029                     | 5.53                   | 14,572                       | 13,039                   | 40.16                                    |
| Nz-1          | 400,667                     | 5.50                   | 15,013                       | 13,730                   | 39.94                                    |
| Dra-2         | 444,675                     | 6.88                   | 15,653                       | 15,479                   | 49.96                                    |
| Belmonte-4-94 | 242,616                     | 3.61                   | 15,003                       | 14,884                   | 26.22                                    |
| Sha / Ara-1   | 147,138                     | 2.18                   | 14,961                       | 14,839                   | 15.83                                    |
| Sij-2         | 260,428                     | 3.74                   | 14,578                       | 14,379                   | 27.16                                    |
| Col-0         | 237,301                     | 4.44                   | 19,185                       | 18,724                   | 32.24                                    |
| AH-7          | 291,133                     | 3.82                   | 14,842                       | 13,122                   | 27.74                                    |
| Tibet-0       | 349,873                     | 5.99                   | 17,608                       | 17,134                   | 43.50                                    |
| Etna-2        | 849,782                     | 6.86                   | 9,382                        | 8,072                    | 49.82                                    |
| Meh-0         | 902,680                     | 7.99                   | 10,117                       | 8,850                    | 58.02                                    |
| Elk-1         | 857,356                     | 8.15                   | 10,493                       | 9,504                    | 59.19                                    |
| Ket-10        | 936,164                     | 8.28                   | 12,176                       | 8,848                    | 60.13                                    |
| Arb-0         | 821,175                     | 7.75                   | 10,397                       | 9,431                    | 56.28                                    |

<sup>1</sup>Depth was calculated under the estimate of a genome size of 137.70 Mb.

**Supplementary Table 3. Summary of the 11 *Arabidopsis thaliana* ecotypes RNA sequencing data and DNA re-sequencing data for Tibet-0 and Yilong-0.**

| <b>Name</b>   | <b>Number of clean reads</b> | <b>Total data (Gb)</b> | <b>Reads length (bp)</b> | <b>Insert size (bp)</b> | <b>Tissue</b> | <b>Library</b> |
|---------------|------------------------------|------------------------|--------------------------|-------------------------|---------------|----------------|
| Yilong-0      | 37,664,356                   | 5.65                   | 2x150                    | 380                     | Leaf          | RNA            |
| LI-OF-095     | 37,104,946                   | 5.57                   | 2x150                    | 380                     | Leaf          | RNA            |
| Kelsterbach-2 | 35,826,004                   | 5.37                   | 2x150                    | 380                     | Leaf          | RNA            |
| Dra-2         | 35,761,084                   | 5.36                   | 2x150                    | 380                     | Leaf          | RNA            |
| Belmonte-4-94 | 34,019,716                   | 5.10                   | 2x150                    | 380                     | Leaf          | RNA            |
| AH-7          | 33,541,202                   | 5.03                   | 2x150                    | 380                     | Leaf          | RNA            |
| Tibet-0       | 38,939,972                   | 5.84                   | 2x150                    | 380                     | Leaf          | RNA            |
| Meh-0         | 36,202,862                   | 5.43                   | 2x150                    | 380                     | Leaf          | RNA            |
| Elk-1         | 37,121,446                   | 5.57                   | 2x150                    | 380                     | Leaf          | RNA            |
| Ket-10        | 39,128,482                   | 5.87                   | 2x150                    | 380                     | Leaf          | RNA            |
| Arb-0         | 40,749,242                   | 6.11                   | 2x150                    | 380                     | Leaf          | RNA            |
| Yilong-0      | 44,662,924                   | 6.70                   | 2x150                    | 380                     | Leaf          | DNA            |
| Tibet-0       | 60,291,072                   | 9.04                   | 2x150                    | 380                     | Leaf          | DNA            |

**Supplementary Table 4. Summary of the 21 *Arabidopsis thaliana* ecotypes RNA sequencing data downloaded from NCBI SRA database.**

| Name        | Number of clean reads | Total data (Gb) | Reads length (bp) | SRA number | Tissue |
|-------------|-----------------------|-----------------|-------------------|------------|--------|
| Bor-1       | 50,350,855            | 5.04            | 100               | SRX1734500 | Leaf   |
| Cdm-0       | 27,206,548            | 2.72            | 100               | SRX1735085 | Leaf   |
| Got-22      | 19,665,985            | 2.01            | 2x51              | ERX1659469 | Leaf   |
| Kondara     | 32,249,429            | 1.61            | 50                | SRX244065  | Leaf   |
| Kz-9        | 28,682,458            | 1.43            | 50                | SRX244069  | Leaf   |
| LL-0        | 22,747,781            | 2.27            | 100               | SRX1734570 | Leaf   |
| Mammo-1     | 30,691,722            | 3.07            | 100               | SRX1735104 | Leaf   |
| Ms-0        | 23,945,701            | 2.44            | 2x51              | ERX1659521 | Leaf   |
| Pra-6       | 46,299,849            | 4.63            | 100               | SRX1735090 | Leaf   |
| Pu2-23      | 27,962,065            | 1.40            | 50                | SRX244087  | Leaf   |
| Sij-1       | 8,675,693             | 0.87            | 100               | SRX1734411 | Leaf   |
| Sorbo       | 14,789,077            | 1.51            | 2x51              | ERX1659578 | Leaf   |
| TueSB30-3   | 25,926,685            | 2.59            | 100               | SRX1735133 | Leaf   |
| Hs-0        | 27,313,438            | 1.37            | 50                | SRX244052  | Leaf   |
| Per-1       | 36,800,151            | 1.84            | 50                | SRX244083  | Leaf   |
| St-0        | 16,576,939            | 1.69            | 2x51              | ERX1659588 | Leaf   |
| Nz-1        | 26,722,923            | 2.67            | 100               | SRX1734610 | Leaf   |
| Sha / Ara-1 | 53,209,654            | 5.32            | 100               | SRX1734418 | Leaf   |
| Sij-2       | 33,211,699            | 3.32            | 100               | SRX1734412 | Leaf   |
| Col-0       | 74,711,902            | 21.77           | 2x146             | SRX1735134 | Leaf   |
| Etna-2      | 61,441,623            | 6.14            | 100               | SRX1734938 | Leaf   |

**Supplementary Table 5. K-mer analysis of the Col-0 genome by using K-mer=17.**

| <b>Name</b> | <b>K-mer</b> | <b>K-mer<br/>number</b> | <b>K-mer<br/>depth (X)</b> | <b>Genome<br/>size (Mb)</b> | <b>Heterozygous<br/>ratio (%)</b> | <b>Repeat<br/>(%)</b> |
|-------------|--------------|-------------------------|----------------------------|-----------------------------|-----------------------------------|-----------------------|
| Col-0       | 17           | 6,471,685,116           | 47                         | 137.70                      | 0.215                             | 32.58                 |

**Supplementary Table 6. Summary of the 32 *Arabidopsis thaliana* ecotypes genome assembly.**

| Name          | Genome length (Mb) | Contig number | Contig N50 (Mb) | Scaffold N50 (Mb) | BUSCO (%) | Repeat rate (%) |
|---------------|--------------------|---------------|-----------------|-------------------|-----------|-----------------|
| Yilong-0      | 141.8              | 35            | 7.35            | 27.56             | 99.2      | 25.99           |
| Bor-1         | 135.7              | 25            | 10.72           | 27.16             | 99.2      | 24.07           |
| Cdm-0         | 131.2              | 37            | 6.94            | 25.49             | 99.3      | 21.52           |
| Got-22        | 137.9              | 34            | 9.06            | 27.07             | 99.3      | 24.40           |
| Kondara       | 136.4              | 28            | 12.32           | 25.76             | 99.3      | 23.96           |
| Kz-9          | 132.4              | 39            | 6.96            | 26.36             | 99.3      | 22.14           |
| LL-0          | 138.0              | 27            | 10.61           | 27.35             | 99.2      | 25.24           |
| Mammo-1       | 131.2              | 51            | 6.72            | 26.90             | 99.2      | 21.68           |
| Ms-0          | 136.3              | 32            | 9.61            | 26.53             | 99.3      | 24.46           |
| Pra-6         | 136.6              | 43            | 8.22            | 26.10             | 99.2      | 23.25           |
| Pu2-23        | 141.1              | 27            | 12.41           | 27.06             | 99.3      | 26.25           |
| Sij-1         | 134.6              | 38            | 9.02            | 25.39             | 99.2      | 23.61           |
| Sorbo         | 132.7              | 53            | 6.27            | 23.30             | 99.1      | 21.87           |
| TueSB30-3     | 138.4              | 23            | 20.30           | 26.96             | 99.2      | 24.64           |
| Hs-0          | 137.9              | 38            | 7.54            | 26.96             | 99.2      | 24.75           |
| LI-OF-095     | 132.7              | 41            | 7.97            | 24.62             | 99.2      | 21.42           |
| Per-1         | 136.4              | 31            | 9.87            | 26.74             | 99.2      | 23.29           |
| St-0          | 129.4              | 55            | 7.82            | 24.67             | 99.2      | 20.34           |
| Kelsterbach-2 | 135.4              | 19            | 13.22           | 27.38             | 99.2      | 24.00           |
| Nz-1          | 136.5              | 22            | 10.38           | 27.11             | 99.2      | 23.47           |
| Dra-2         | 138.9              | 17            | 14.61           | 27.08             | 99.3      | 24.55           |
| Belmonte-4-94 | 134.9              | 22            | 11.95           | 26.62             | 99.1      | 22.51           |
| Sha / Ara-1   | 135.6              | 54            | 6.28            | 26.43             | 99.3      | 23.86           |
| Sij-2         | 134.7              | 36            | 7.84            | 26.18             | 99.2      | 23.60           |
| Col-0         | 134.4              | 30            | 14.27           | 26.11             | 99.2      | 23.00           |
| AH-7          | 140.3              | 39            | 7.52            | 25.53             | 99.2      | 25.42           |
| Tibet-0       | 137.2              | 35            | 13.73           | 26.23             | 99.0      | 24.77           |
| Etna-2        | 143.0              | 48            | 9.93            | 27.29             | 99.1      | 25.43           |
| Meh-0         | 140.5              | 56            | 5.91            | 26.79             | 99.2      | 25.52           |
| Elk-1         | 139.2              | 37            | 8.66            | 27.12             | 99.2      | 25.38           |
| Ket-10        | 144.9              | 30            | 8.08            | 27.89             | 99.2      | 26.44           |
| Arb-0         | 138.6              | 20            | 17.56           | 27.08             | 99.1      | 24.86           |

**Supplementary Table 7. Summary of the 32 *Arabidopsis thaliana* ecotypes gene annotation.**

| Name          | Gene number | BUSCO | Functional annotation number | Annotation rate |
|---------------|-------------|-------|------------------------------|-----------------|
| Yilong-0      | 27,683      | 99.4% | 25,916                       | 93.62%          |
| Bor-1         | 27,801      | 99.3% | 26,087                       | 93.83%          |
| Cdm-0         | 27,666      | 99.1% | 25,963                       | 93.84%          |
| Got-22        | 27,835      | 99.2% | 26,066                       | 93.64%          |
| Kondara       | 27,489      | 99.3% | 25,859                       | 94.07%          |
| Kz-9          | 27,545      | 99.2% | 25,895                       | 94.01%          |
| LL-0          | 27,778      | 99.2% | 26,066                       | 93.84%          |
| Mammo-1       | 27,717      | 99.0% | 25,977                       | 93.72%          |
| Ms-0          | 27,793      | 99.2% | 26,075                       | 93.82%          |
| Pra-6         | 27,772      | 99.3% | 26,002                       | 93.63%          |
| Pu2-23        | 27,962      | 99.2% | 26,183                       | 93.64%          |
| Sij-1         | 27,521      | 99.2% | 25,822                       | 93.83%          |
| Sorbo         | 27,646      | 99.1% | 25,913                       | 93.73%          |
| TueSB30-3     | 27,805      | 99.1% | 26,092                       | 93.84%          |
| Hs-0          | 27,838      | 99.4% | 26,092                       | 93.73%          |
| LI-OF-095     | 27,865      | 99.2% | 26,086                       | 93.62%          |
| Per-1         | 27,793      | 98.9% | 26,019                       | 93.62%          |
| St-0          | 27,775      | 99.1% | 26,018                       | 93.67%          |
| Kelsterbach-2 | 27,956      | 99.3% | 26,157                       | 93.56%          |
| Nz-1          | 27,866      | 99.5% | 26,099                       | 93.66%          |
| Dra-2         | 27,913      | 99.3% | 26,138                       | 93.64%          |
| Belmonte-4-94 | 27,716      | 99.2% | 25,953                       | 93.64%          |
| Sha / Ara-1   | 27,471      | 99.2% | 25,802                       | 93.92%          |
| Sij-2         | 27,535      | 99.2% | 25,856                       | 93.90%          |
| Col-0         | 28,735      | 99.7% | 26,625                       | 92.66%          |
| AH-7          | 27,531      | 99.3% | 25,867                       | 93.96%          |
| Tibet-0       | 27,239      | 99.1% | 25,650                       | 94.17%          |
| Etna-2        | 27,812      | 99.1% | 26,096                       | 93.83%          |
| Meh-0         | 27,661      | 99.0% | 25,935                       | 93.76%          |
| Elk-1         | 27,686      | 99.5% | 26,018                       | 93.98%          |
| Ket-10        | 27,607      | 99.0% | 25,951                       | 94.00%          |
| Arb-0         | 27,711      | 99.2% | 26,009                       | 93.86%          |



**Supplementary Table 8. Our gene annotation of 32 *Arabidopsis thaliana* ecotypes' genome assemblies compare with Araport11 gene annotation.**

| <b>Name</b>   | <b>Mapped gene number<sup>1</sup></b> | <b>Unmapped gene number</b> | <b>New genes or genes with structure variant number</b> | <b>Final gene number</b> |
|---------------|---------------------------------------|-----------------------------|---------------------------------------------------------|--------------------------|
| Yilong-0      | 23,439                                | 4,215                       | 4,244                                                   | 27,683                   |
| Bor-1         | 24,136                                | 3,518                       | 3,665                                                   | 27,801                   |
| Cdm-0         | 23,903                                | 3,751                       | 3,763                                                   | 27,666                   |
| Got-22        | 24,183                                | 3,471                       | 3,652                                                   | 27,835                   |
| Kondara       | 23,651                                | 4,003                       | 3,838                                                   | 27,489                   |
| Kz-9          | 23,716                                | 3,938                       | 3,829                                                   | 27,545                   |
| LL-0          | 24,043                                | 3,611                       | 3,735                                                   | 27,778                   |
| Mammo-1       | 23,901                                | 3,753                       | 3,816                                                   | 27,717                   |
| Ms-0          | 23,851                                | 3,803                       | 3,942                                                   | 27,793                   |
| Pra-6         | 24,144                                | 3,510                       | 3,628                                                   | 27,772                   |
| Pu2-23        | 24,390                                | 3,264                       | 3,572                                                   | 27,962                   |
| Sij-1         | 23,738                                | 3,916                       | 3,783                                                   | 27,521                   |
| Sorbo         | 23,739                                | 3,915                       | 3,907                                                   | 27,646                   |
| TueSB30-3     | 24,131                                | 3,523                       | 3,674                                                   | 27,805                   |
| Hs-0          | 24,157                                | 3,497                       | 3,681                                                   | 27,838                   |
| LI-OF-095     | 24,038                                | 3,616                       | 3,827                                                   | 27,865                   |
| Per-1         | 23,829                                | 3,825                       | 3,964                                                   | 27,793                   |
| St-0          | 24,300                                | 3,354                       | 3,475                                                   | 27,775                   |
| Kelsterbach-2 | 24,404                                | 3,250                       | 3,552                                                   | 27,956                   |
| Nz-1          | 24,176                                | 3,478                       | 3,690                                                   | 27,866                   |
| Dra-2         | 24,107                                | 3,547                       | 3,806                                                   | 27,913                   |
| Belmonte-4-94 | 24,123                                | 3,531                       | 3,593                                                   | 27,716                   |
| Sha / Ara-1   | 23,673                                | 3,981                       | 3,798                                                   | 27,471                   |
| Sij-2         | 23,728                                | 3,926                       | 3,807                                                   | 27,535                   |
| Col-0         | 27,173                                | 481                         | 1,562                                                   | 28,735                   |
| AH-7          | 23,297                                | 4,357                       | 4,234                                                   | 27,531                   |
| Tibet-0       | 22,465                                | 5,189                       | 4,774                                                   | 27,239                   |
| Etna-2        | 23,246                                | 4,408                       | 4,566                                                   | 27,812                   |
| Meh-0         | 23,016                                | 4,638                       | 4,645                                                   | 27,661                   |
| Elk-1         | 23,333                                | 4,321                       | 4,353                                                   | 27,686                   |
| Ket-10        | 22,901                                | 4,753                       | 4,706                                                   | 27,607                   |
| Arb-0         | 23,404                                | 4,250                       | 4,307                                                   | 27,711                   |

<sup>1</sup>Complete genes of >90% identity and coverage with Araport11.

**Supplementary Table 9. Results of multiple regression between variable genes and 19 BIOCLIM environmental variables with the Monte Carlo permutation test.**

|             | PC1            | PC2            | R <sup>2</sup> | Pr(>r)          |
|-------------|----------------|----------------|----------------|-----------------|
| BIO1        | -0.32383       | 0.94612        | 0.0295         | 0.65355         |
| <b>BIO2</b> | <b>0.1971</b>  | <b>0.98038</b> | <b>0.1883</b>  | <b>0.0444*</b>  |
| BIO3        | -0.8503        | 0.52629        | 0.0174         | 0.76999         |
| BIO4        | 0.76652        | 0.64222        | 0.1037         | 0.20089         |
| BIO5        | 0.29219        | 0.95636        | 0.1838         | 0.05263         |
| BIO6        | -0.96048       | -0.27836       | 0.0152         | 0.80755         |
| <b>BIO7</b> | <b>0.54363</b> | <b>0.83932</b> | <b>0.1982</b>  | <b>0.04078*</b> |
| BIO8        | -0.86952       | -0.49391       | 0.0572         | 0.42143         |
| BIO9        | 0.42596        | 0.90474        | 0.0735         | 0.33393         |
| BIO10       | 0.22402        | 0.97459        | 0.0897         | 0.2556          |
| BIO11       | -0.96278       | 0.27028        | 0.0188         | 0.76403         |
| BIO12       | 0.00403        | -0.99999       | 0.048          | 0.48691         |
| BIO13       | -0.55576       | -0.83134       | 0.0547         | 0.42956         |
| BIO14       | 0.38325        | -0.92365       | 0.046          | 0.49429         |
| BIO15       | -0.84062       | 0.54162        | 0.0428         | 0.52047         |
| BIO16       | -0.49465       | -0.86909       | 0.0568         | 0.41375         |
| BIO17       | 0.43401        | -0.90091       | 0.0512         | 0.4502          |
| BIO18       | -0.62735       | -0.77874       | 0.1301         | 0.1284          |
| BIO19       | 0.97388        | -0.22708       | 0.0635         | 0.37733         |

**Supplementary Table 10. Summary of pan-TE library constructed by 32 *Arabidopsis thaliana* ecotypes genome assembly.**

| Type                    | Number of sequences in pan-TE library |
|-------------------------|---------------------------------------|
| Cent/centromeric_repeat | 6                                     |
| DNA/CACTA               | 14                                    |
| DNA/DTA                 | 3                                     |
| DNA/DTC                 | 7                                     |
| DNA/DTH                 | 3                                     |
| DNA/DTM                 | 9                                     |
| DNA/DTT                 | 1                                     |
| DNA/Harbinger           | 3                                     |
| DNA/Helitron            | 61                                    |
| DNA/Mariner             | 7                                     |
| DNA/MuDR                | 58                                    |
| DNA/hAT                 | 22                                    |
| DNA/unknown             | 16                                    |
| LINE/L1                 | 12                                    |
| LINE/unknown            | 7                                     |
| LTR/Copia               | 294                                   |
| LTR/Gypsy               | 84                                    |
| LTR/Ty3                 | 66                                    |
| LTR/unknown             | 34                                    |
| MITE/DTA                | 23                                    |
| MITE/DTC                | 1                                     |
| MITE/DTH                | 5                                     |
| MITE/DTM                | 9                                     |
| SINE/tRNA               | 5                                     |
| SINE/unknown            | 15                                    |
| Satellite/Satellite     | 10                                    |
| rDNA/spacer             | 1                                     |
| repeat/unknown          | 4                                     |
| <b>Total</b>            | <b>780</b>                            |

**Supplementary Table 11. Intact LTR-RTs identified in the 32 *Arabidopsis thaliana* ecotypes genome assembly.**

| Name          | Total intact<br>LTR-RTs<br>searched | Copia | Gypsy | Unknown | Whole<br>genome LAI |
|---------------|-------------------------------------|-------|-------|---------|---------------------|
| Yilong-0      | 1,498                               | 678   | 640   | 180     | 24.92               |
| Bor-1         | 1,554                               | 606   | 708   | 240     | 24.52               |
| Cdm-0         | 1,554                               | 672   | 684   | 198     | 20.47               |
| Got-22        | 1,476                               | 648   | 642   | 186     | 25.75               |
| Kondara       | 1,560                               | 762   | 612   | 186     | 21.29               |
| Kz-9          | 1,842                               | 816   | 624   | 402     | 22.75               |
| LL-0          | 1,794                               | 702   | 702   | 390     | 13.30               |
| Mammo-1       | 1,578                               | 546   | 774   | 258     | 5.89                |
| Ms-0          | 1,734                               | 732   | 696   | 306     | 26.72               |
| Pra-6         | 1,716                               | 702   | 744   | 270     | 26.59               |
| Pu2-23        | 1,680                               | 726   | 684   | 270     | 19.20               |
| Sij-1         | 1,582                               | 780   | 598   | 204     | 20.71               |
| Sorbo         | 1,528                               | 744   | 610   | 174     | 26.01               |
| TueSB30-3     | 2,082                               | 702   | 906   | 474     | 24.28               |
| Hs-0          | 1,536                               | 672   | 636   | 228     | 18.50               |
| LI-OF-095     | 1,344                               | 552   | 630   | 162     | 19.26               |
| Per-1         | 1,884                               | 840   | 702   | 342     | 9.08                |
| St-0          | 1,590                               | 606   | 708   | 276     | 12.02               |
| Kelsterbach-2 | 1,632                               | 600   | 804   | 228     | 14.55               |
| Nz-1          | 1,632                               | 636   | 720   | 276     | 20.31               |
| Dra-2         | 1,632                               | 666   | 714   | 252     | 25.89               |
| Belmonte-4-94 | 1,650                               | 612   | 750   | 288     | 20.96               |
| Sha / Ara-1   | 1,720                               | 900   | 664   | 156     | 25.40               |
| Sij-2         | 1,564                               | 780   | 592   | 192     | 25.59               |
| Wa-1          | 1,518                               | 648   | 582   | 288     | 8.89                |
| Col-0         | 1,662                               | 648   | 582   | 432     | 9.11                |
| AH-7          | 1,426                               | 660   | 634   | 132     | 21.02               |
| Tibet-0       | 1,656                               | 852   | 504   | 300     | 21.45               |
| Etna-2        | 1,614                               | 696   | 642   | 276     | 18.40               |
| Meh-0         | 1,536                               | 798   | 558   | 180     | 19.27               |
| Elk-1         | 1,878                               | 798   | 756   | 324     | 21.70               |
| Ket-10        | 1,884                               | 864   | 798   | 222     | 26.91               |
| Arb-0         | 1,638                               | 804   | 618   | 216     | 20.79               |

**Supplementary Table 12. Summary of the graph pan-genome constructed by 32 *Arabidopsis thaliana* ecotype genomes.**

| Name                     | Node number    | Node total length (bp) | Edge number    |
|--------------------------|----------------|------------------------|----------------|
| Yilong-0                 | 4,288          | 2,723,335              | 8,666          |
| Bor-1                    | 2,906          | 1,866,149              | 5,699          |
| Cdm-0                    | 6,234          | 3,634,406              | 11,965         |
| Got-22                   | 9,539          | 4,309,907              | 17,200         |
| Kondara                  | 929            | 607,155                | 1,894          |
| Kz-9                     | 4,078          | 2,919,425              | 8,231          |
| LL-0                     | 6,341          | 3,912,693              | 12,146         |
| Mammo-1                  | 5,999          | 3,937,871              | 11,619         |
| Ms-0                     | 3,667          | 2,666,982              | 7,220          |
| Pra-6                    | 3,471          | 2,620,414              | 6,837          |
| Pu2-23                   | 11,485         | 4,581,976              | 20,241         |
| Sij-1                    | 1,965          | 1,294,515              | 4,004          |
| Sorbo                    | 3,541          | 2,370,470              | 7,255          |
| TueSB30-3                | 3,416          | 2,598,179              | 6,818          |
| Hs-0                     | 18,527         | 6,662,639              | 32,260         |
| LI-OF-095                | 6,063          | 3,559,427              | 10,971         |
| Per-1                    | 5,356          | 3,764,710              | 10,750         |
| St-0                     | 30,069         | 8,897,664              | 51,070         |
| Kelsterbach-2            | 8,691          | 3,857,415              | 15,397         |
| Nz-1                     | 7,590          | 4,131,644              | 13,375         |
| Dra-2                    | 4,850          | 2,724,617              | 9,578          |
| Belmonte-4-94            | 6,401          | 4,037,183              | 12,190         |
| Sha / Ara-1              | 1,425          | 1,359,281              | 2,901          |
| Sij-2                    | 29             | 81,101                 | 56             |
| <b>Col-0 (reference)</b> | 264,421        | 134,371,593            | 264,416        |
| AH-7                     | 3,020          | 1,626,251              | 6,294          |
| Tibet-0                  | 8,168          | 5,353,959              | 17,402         |
| Etna-2                   | 6,304          | 4,145,369              | 13,373         |
| Meh-0                    | 7,764          | 4,467,368              | 15,817         |
| Elk-1                    | 7,486          | 4,173,776              | 15,049         |
| Ket-10                   | 8,086          | 5,750,331              | 16,723         |
| Arb-0                    | 6,059          | 4,264,136              | 12,275         |
| <b>Total</b>             | <b>468,168</b> | <b>243,271,941</b>     | <b>649,692</b> |

**Supplementary Table 13. Summary of the structural variations (SVs) detected in graph-based pan-genome constructed by 32 *Arabidopsis thaliana* ecotype genomes.**

| <b>SV type</b>      | <b>SV number</b> | <b>SV length (bp)</b> | <b>SV influenced gene number</b> | <b>SV influenced gene percentage (%)</b> | <b>SV with TE inserted</b> | <b>SV with TE inserted percentage (%)</b> |
|---------------------|------------------|-----------------------|----------------------------------|------------------------------------------|----------------------------|-------------------------------------------|
| Biallelic/Insertion | 3,259            | 5,543,728             | 2,746                            | 9.56                                     | 1,870                      | 57.4                                      |
| Biallelic/Deletion  | 2,701            | 1,086,966             | 2,098                            | 7.30                                     | 775                        | 28.7                                      |
| Biallelic/Divergent | 26,132           | 7,508,504             | 13,694                           | 47.66                                    | 3,084                      | 11.80                                     |
| Multiallelic        | 29,230           | 29,647,715            | 9,084                            | 31.61                                    | 8,184                      | 28.00                                     |

**Supplementary Table 14. Summary of SV classification and TE insertion in the 32 *Arabidopsis thaliana* ecotypes genome assembly.**

| <b>Name</b>        | <b>Ecotype specific SV</b> | <b>Total SV</b> | <b>Ecotype specific SV with TE insertion</b> | <b>Total SV with TE insertion</b> |
|--------------------|----------------------------|-----------------|----------------------------------------------|-----------------------------------|
| Yilong-0           | 311                        | 12,074          | 99                                           | 2,118                             |
| Bor-1              | 411                        | 9,494           | 166                                          | 1,730                             |
| Cdm-0              | 794                        | 10,429          | 240                                          | 1,776                             |
| Got-22             | 404                        | 9,725           | 134                                          | 1,743                             |
| Kondara            | 151                        | 10,762          | 49                                           | 1,895                             |
| Kz-9               | 602                        | 10,862          | 175                                          | 1,939                             |
| LL-0               | 712                        | 10,095          | 254                                          | 1,864                             |
| Mammo-1            | 677                        | 10,139          | 242                                          | 1,789                             |
| Ms-0               | 454                        | 10,062          | 166                                          | 1,794                             |
| Pra-6              | 441                        | 9,438           | 151                                          | 1,785                             |
| Pu2-23             | 424                        | 8,577           | 137                                          | 1,601                             |
| Sij-1              | 6                          | 10,831          | 5                                            | 1,912                             |
| Sorbo              | 294                        | 10,683          | 99                                           | 1,924                             |
| TueSB30-3          | 429                        | 9,640           | 142                                          | 1,763                             |
| Hs-0               | 481                        | 9,196           | 165                                          | 1,626                             |
| LI-OF-095          | 430                        | 9,707           | 158                                          | 1,797                             |
| Per-1              | 570                        | 10,568          | 176                                          | 1,904                             |
| St-0               | 457                        | 8,878           | 174                                          | 1,678                             |
| Kelsterbach-2      | 462                        | 8,828           | 182                                          | 1,604                             |
| Nz-1               | 410                        | 9,416           | 156                                          | 1,702                             |
| Dra-2              | 411                        | 9,458           | 119                                          | 1,688                             |
| Belmonte-4-94      | 557                        | 9,409           | 208                                          | 1,758                             |
| Sha / Ara-1        | 244                        | 10,968          | 97                                           | 1,963                             |
| Sij-2              | 1                          | 10,829          | 1                                            | 1,917                             |
| <b>Col-0</b>       | -                          | -               | -                                            | -                                 |
| <b>(reference)</b> | -                          | -               | -                                            | -                                 |
| AH-7               | 753                        | 12,820          | 167                                          | 2,081                             |
| Tibet-0            | 3,109                      | 16,281          | 685                                          | 2,424                             |
| Etna-2             | 2,239                      | 14,461          | 550                                          | 2,251                             |
| Meh-0              | 1,803                      | 14,935          | 465                                          | 2,242                             |
| Elk-1              | 1,165                      | 12,672          | 327                                          | 2,043                             |
| Ket-10             | 2,521                      | 15,963          | 594                                          | 2,392                             |
| Arb-0              | 1,316                      | 12,711          | 381                                          | 2,014                             |

**Supplementary Table 15. Summary of the structural variations (SVs) location detected in graph-based pan-genome constructed by 32 *Arabidopsis thaliana* ecotype genomes.**

| SV type             | Gene Upstream<br>2k | Gene<br>Downstream 2k | CDS   | Intron | Total  |
|---------------------|---------------------|-----------------------|-------|--------|--------|
| Biallelic/Insertion | 2,210               | 1,891                 | 276   | 304    | 4,423  |
| Biallelic/Deletion  | 1,496               | 1,438                 | 446   | 473    | 3,313  |
| Biallelic/Divergent | 10,668              | 10,024                | 2,271 | 5,542  | 17,531 |
| Multiallelic        | 7,684               | 6,529                 | 1,583 | 2,193  | 12,445 |
| Total               | 16,367              | 15,032                | 4,164 | 7,242  | 22,407 |



**Supplementary Table 16. Primers used for RT-qPCR.**

| <b>Primer name</b> | <b>Sequence (5' to 3')</b>    |
|--------------------|-------------------------------|
| EIF4A-QPCR-F       | CGTGACCCGTGATGATGAGA          |
| EIF4A-QPCR-R       | AGTACGGCAGAGCAAACACA          |
| CCR1-QPCR-F        | GGAACCGTACGGAATCCAGATGATC     |
| CCR1-QPCR-R        | CCTCGTAGTCCTGAAGATCTGCTTTG    |
| KNAT3-QPCR-F       | ATGGCGTTTCATCACAAATCATCTCTCAC |
| KNAT3-QPCR-R       | CTTCTTGAAATGTTGTTGCTGTTGC     |
| WH1-QPCR-F         | TGGTTCCAATCTCAAAGAGATTCTC     |
| WH1-QPCR-R         | GTCTTGAGAAACAAGGATTCCCAGG     |
| HPCA1-QPCR-F       | AACAGTAACTCGGCCCGTTT          |
| HPCA1-QPCR-R       | AGATCCGCAACTCGGACAAG          |

## GenomeScope Profile

len:137,695,428bp uniq:67.4%  
aa:99.8% ab:0.215%  
kcov:24.3 err:0.171% dup:1.53 k:17 p:2

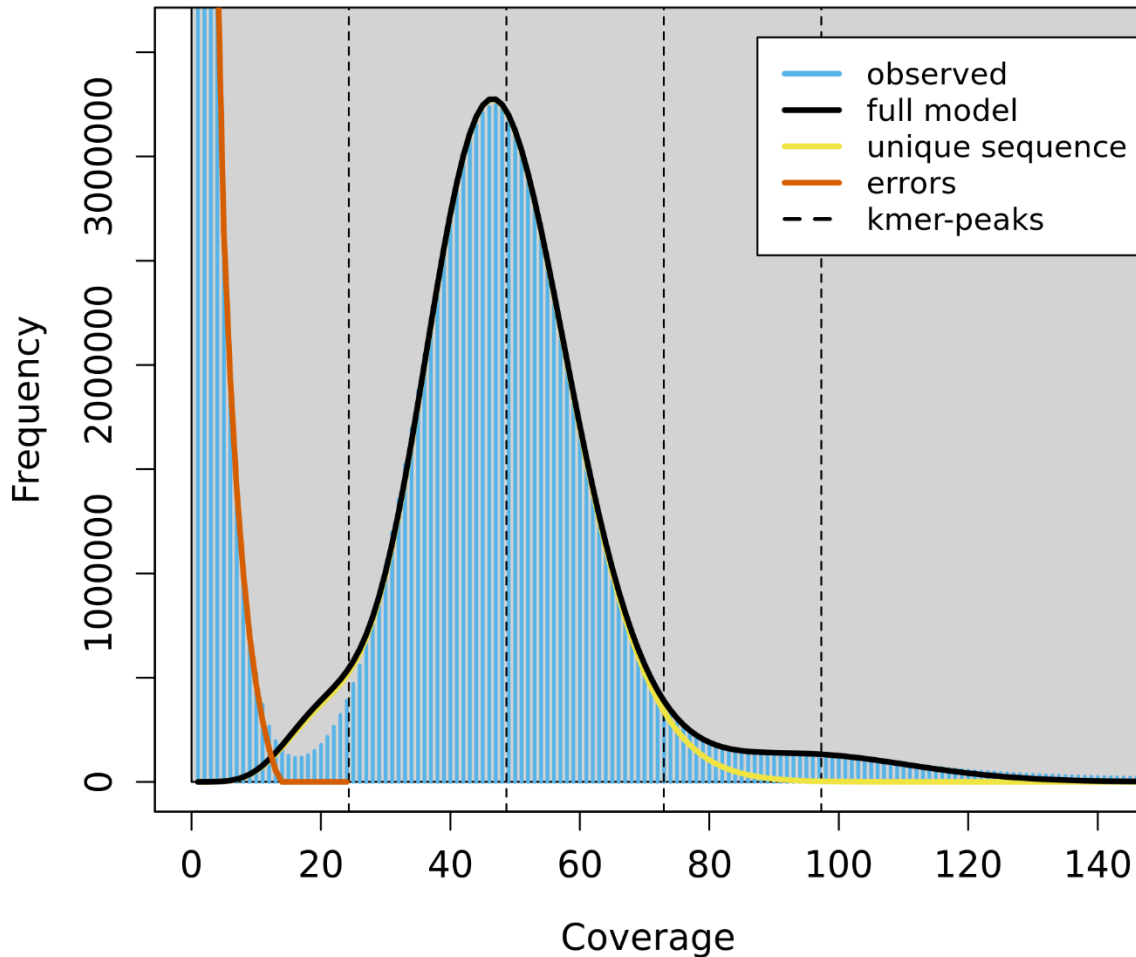

**Supplementary Fig. 1. Estimation of Col-0 genome size by K-mer analysis.** The figure shows the frequency of 17 k-mers, which are 17 bp sequences from clean reads of short-insert-size libraries. We identified 6,471,685,116 K-mers and the peak of K-mer depth is 47. Genome size can be estimated as (total K-mer number) / (the volume peak). The genome size of Col-0 was thus estimated as 137.70 Mb.

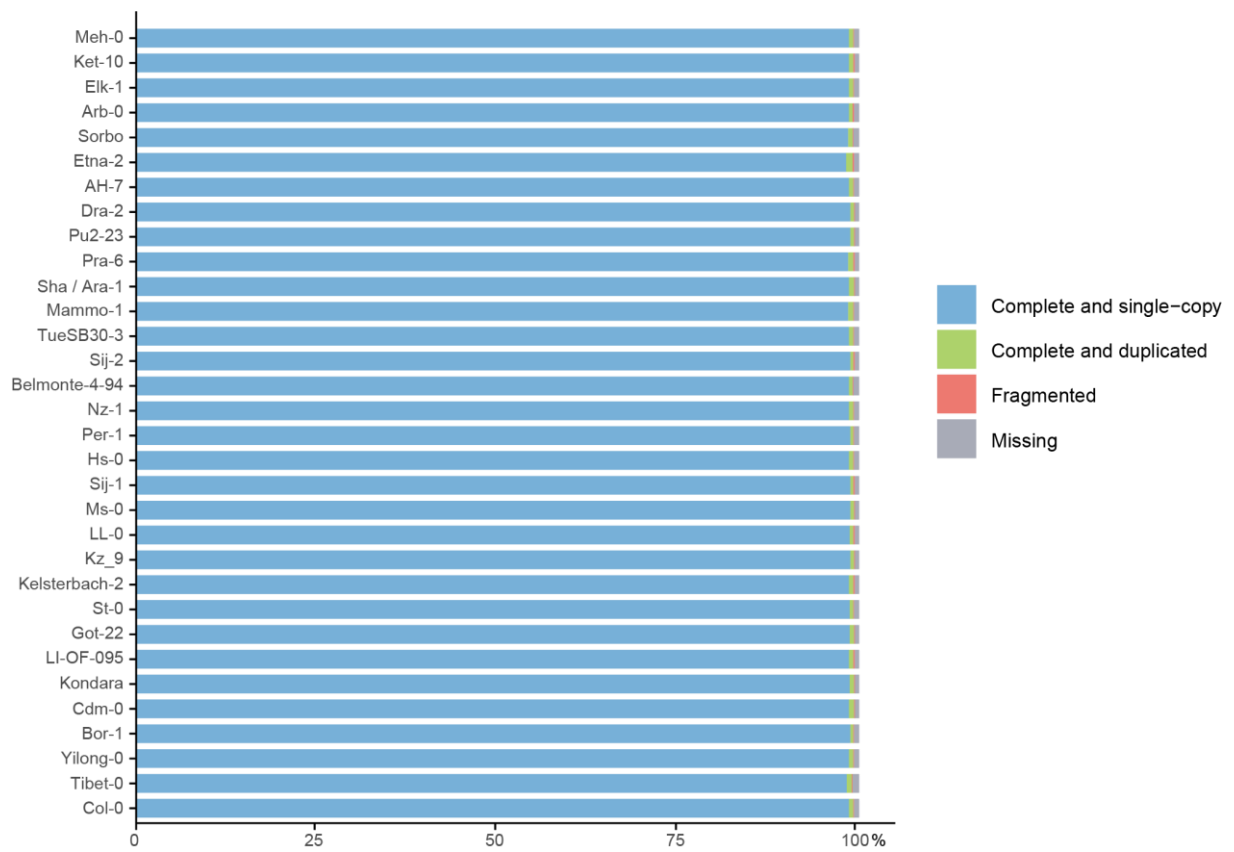

**Supplementary Fig. 2. BUSCO assessment of the 32 *Arabidopsis thaliana* ecotypes genome assemblies.**

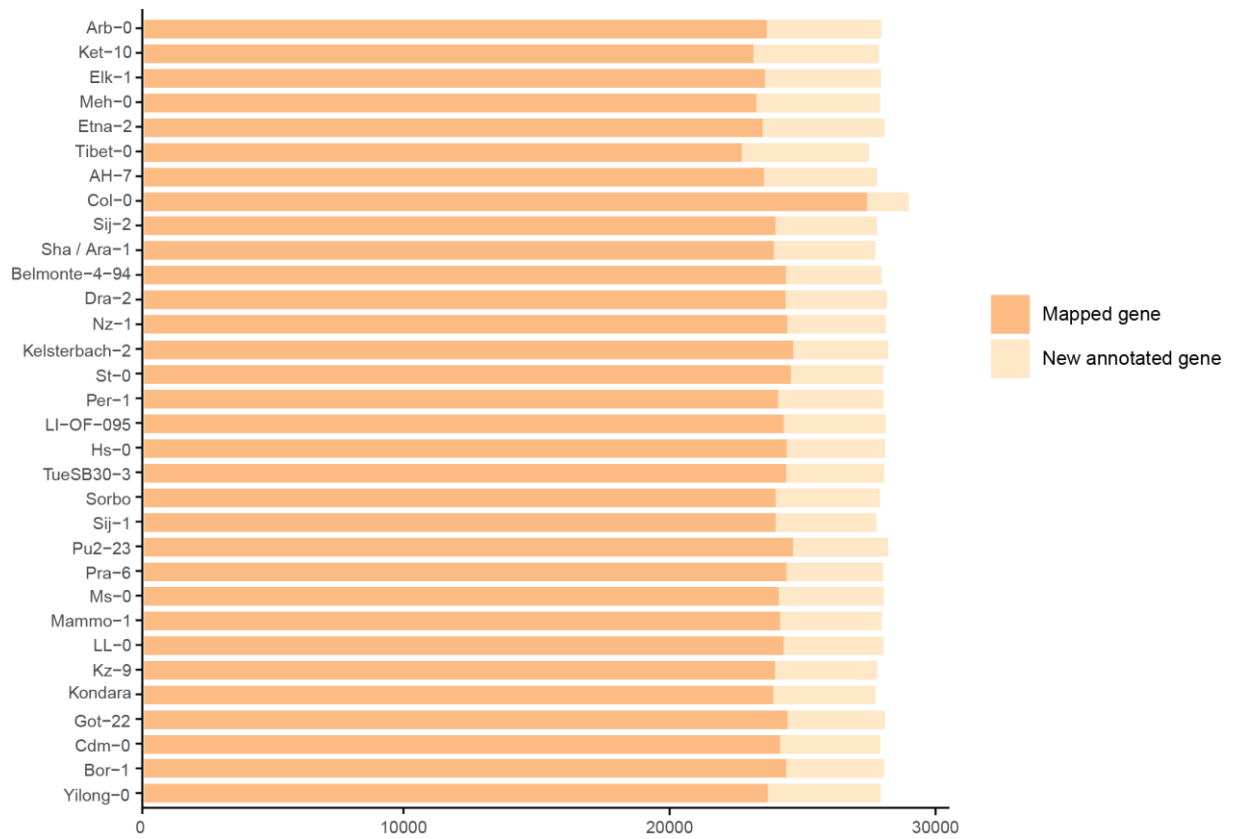

**Supplementary Fig. 3. Summary of our 32 assemblies gene annotation compared with Araport11 version gene annotation of Col-0.**

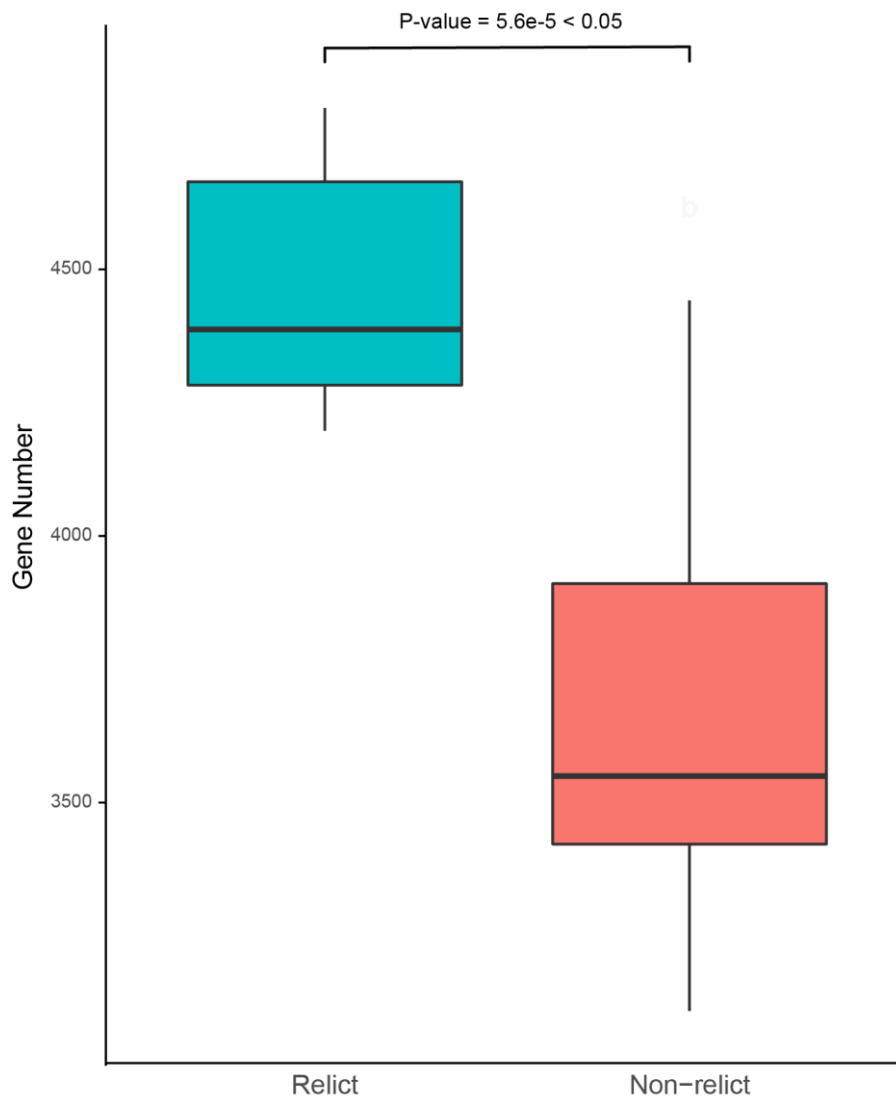

**Supplementary Fig. 4. Comparison of genes different from Araport11 between relict ecotypes and non-relict ecotypes.** Significance tested by two tailed Wilcoxon method with  $p = 5.6e-5 < 0.05$ . The middle line of the boxplot is the median, the lower and upper hinges correspond to the first and third quartiles, the upper whisker extends from the hinge to the largest value no further than  $1.5 \times \text{IQR}$  from the hinge (where IQR is the inter-quartile range) and the lower whisker extends from the hinge to the smallest value at most  $1.5 \times \text{IQR}$  of the hinge, the outliers are removed. Source data are provided as a Source Data file.

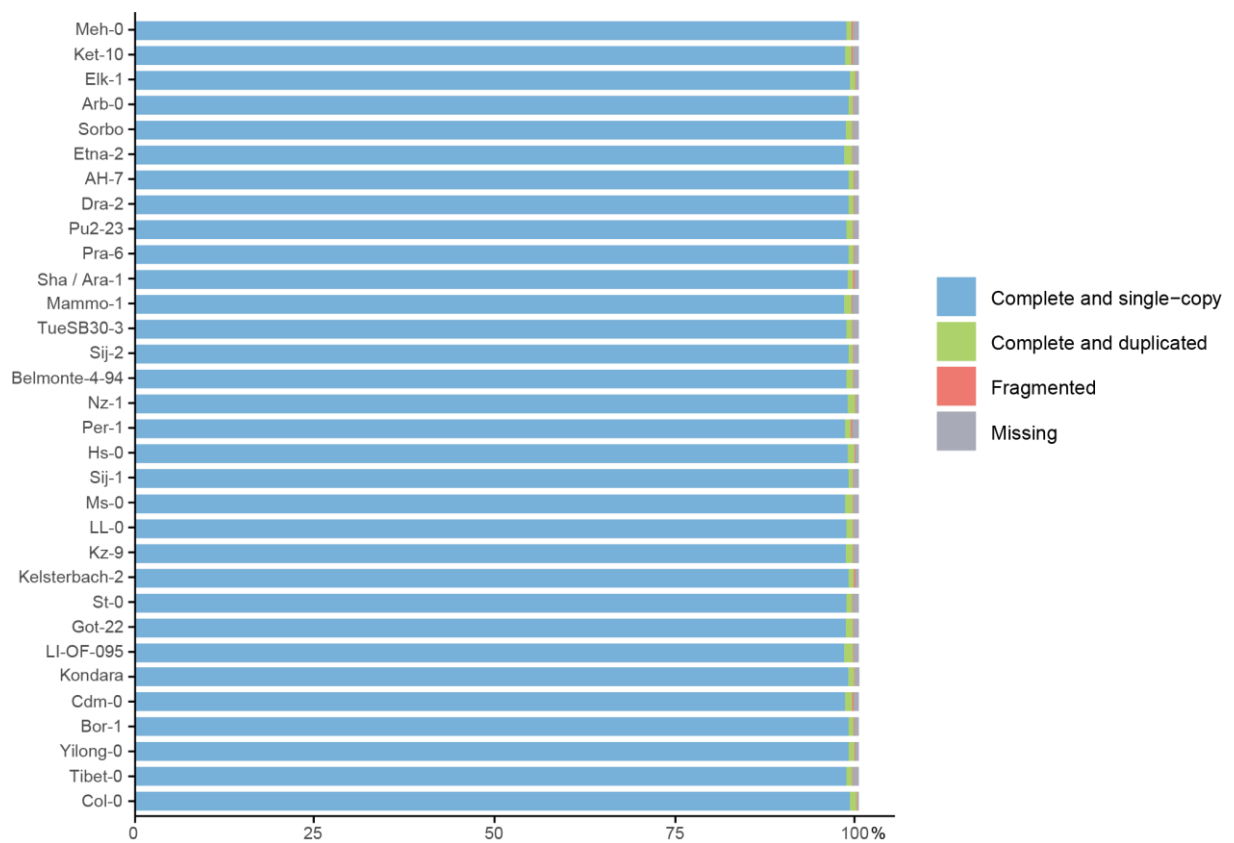

**Supplementary Fig. 5. BUSCO assessment of the 32 *Arabidopsis thaliana* ecotypes genome assemblies' gene annotations.**

## Private Gene

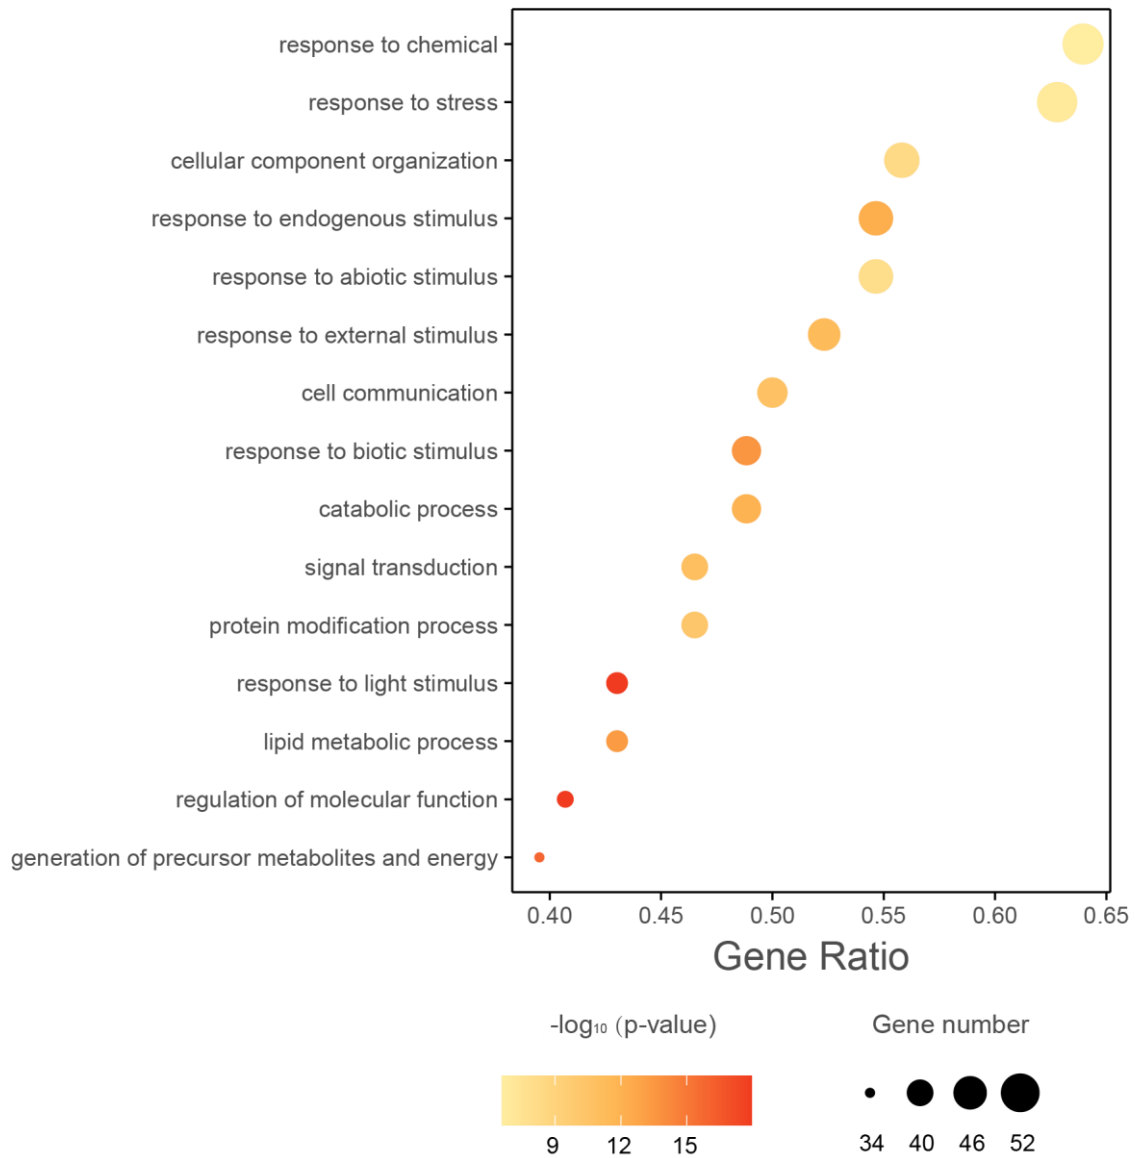

**Supplementary Fig. 6. Bubble chart of GO enrichment analysis for private genes.** Source data are provided as a Source Data file.

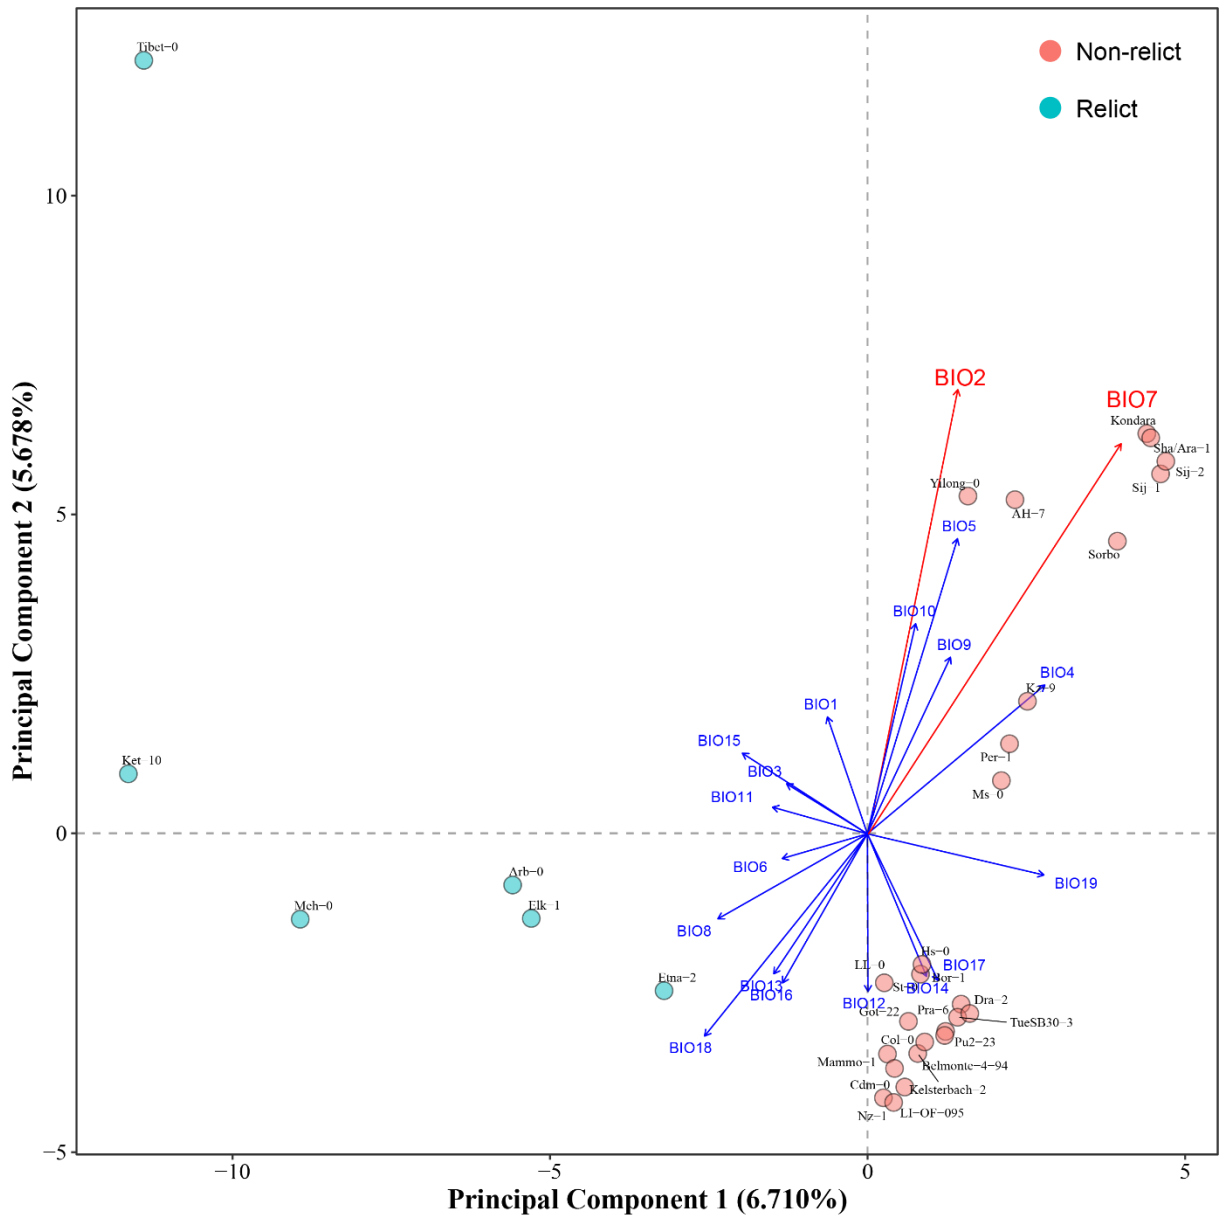

**Supplementary Fig. 7. Principal component analysis (PCA) of 32 *Arabidopsis thaliana* ecotypes based on variable gene families and multiple regression of 19 BIOCLIM environmental variables on selected ordination axes.** Blue circles displays relict ecotypes, while red circles displays non-relict ecotypes. Arrow in red shows significant associated environmental variables. Significance of the regression's coefficient of determination ( $r^2$ ) for each environmental variables was tested by 99,999 times Monte Carlo permutation test. Source data are provided as a Source Data file.



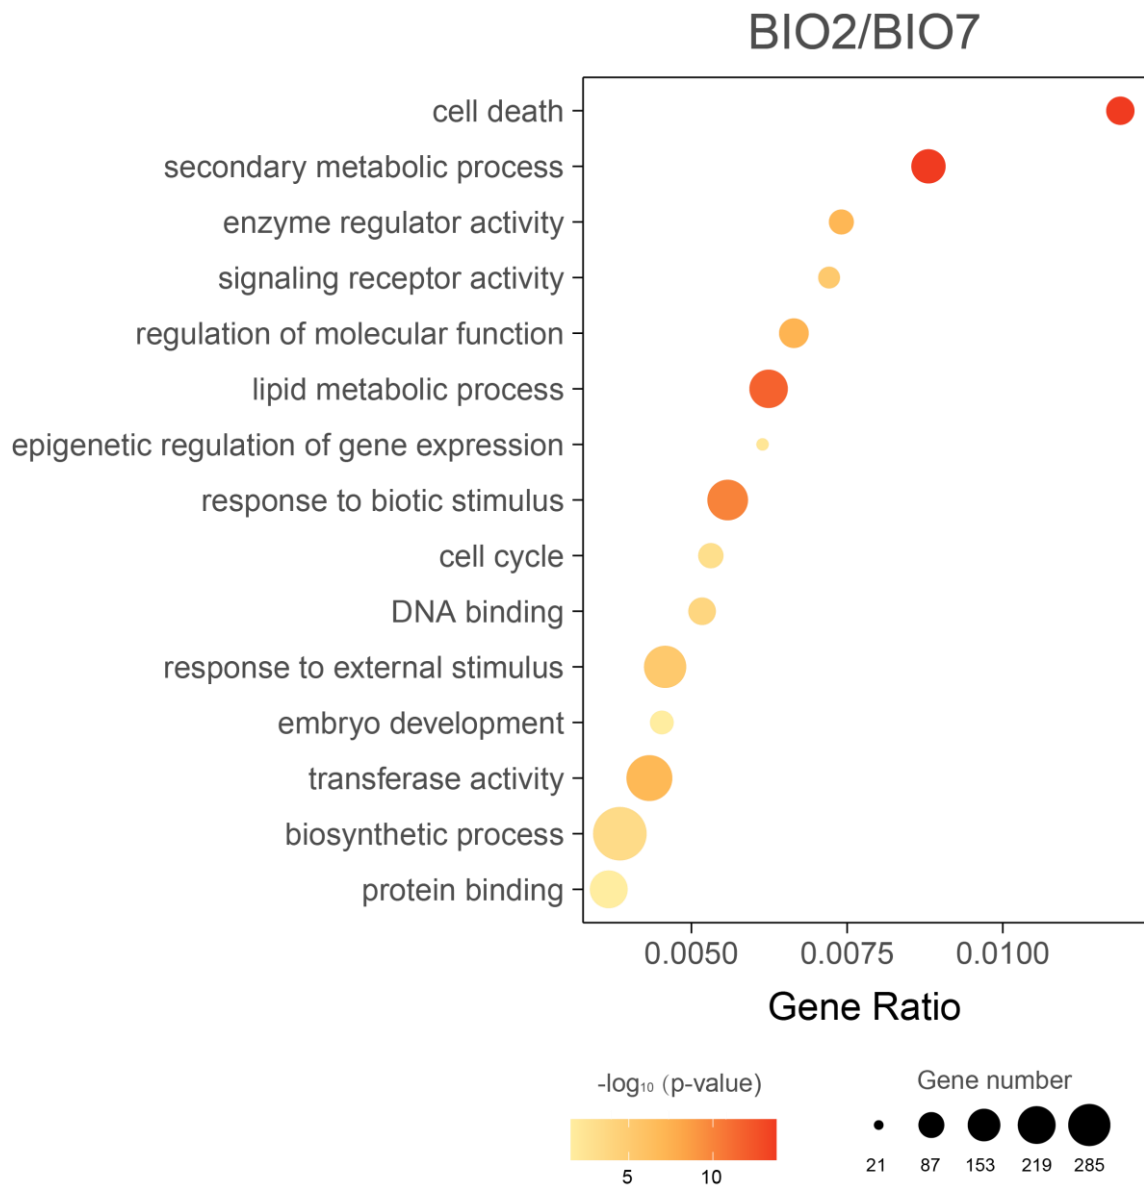

**Supplementary Fig. 8. Bubble chart of GO enrichment analysis for 215 variable genes families significantly associated with BIO2 and BIO7.** Source data are provided as a Source Data file.

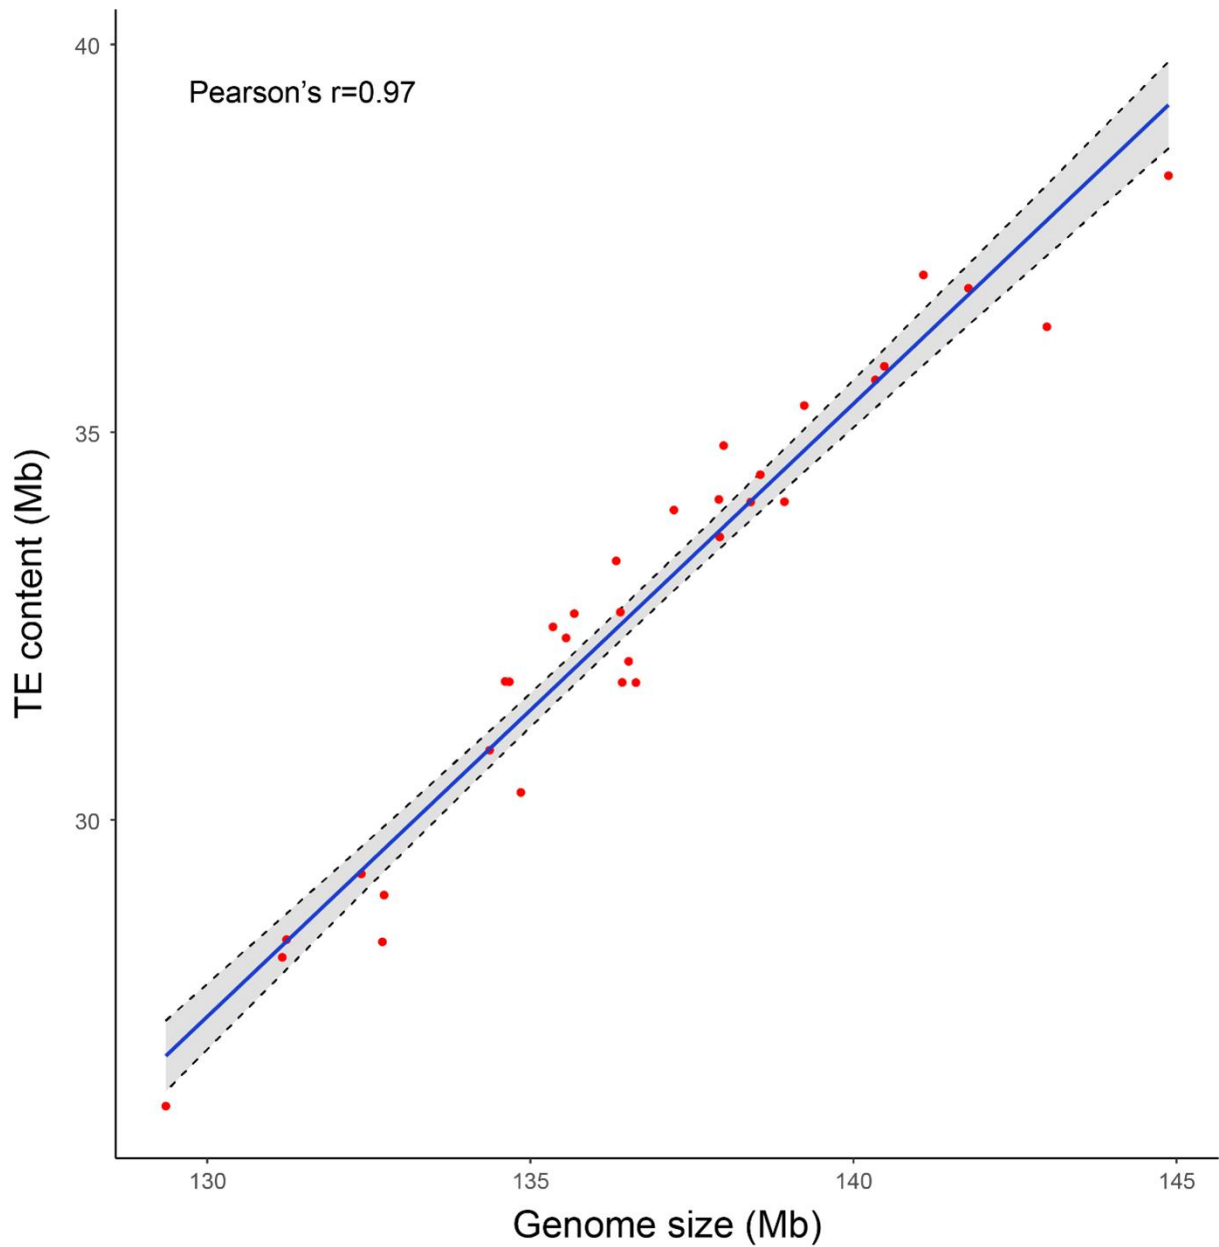

**Supplementary Fig. 9. Pearson's correlation coefficient between TE content and genome size.** Source data are provided as a Source Data file.

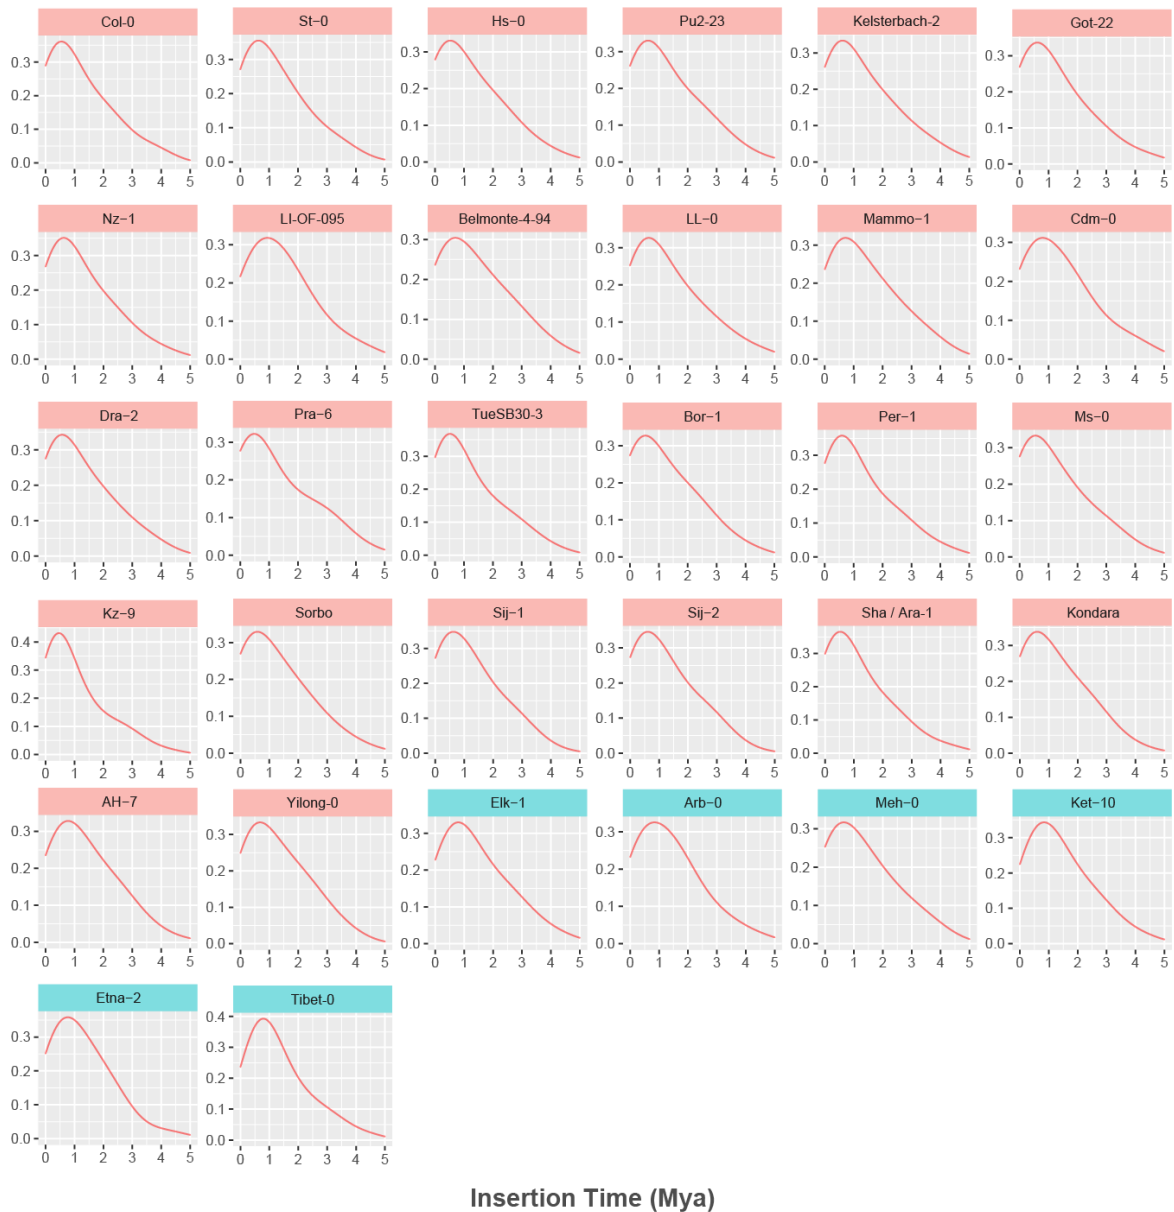

**Supplementary Fig. 10. Intact LTR insertion time distribution of each accessions.** The x-axis represents the insertion time from million years ago (Mya), y-axis represents the density of the insertion time. Blue rectangle displays relict ecotypes, while red rectangle displays non-relict ecotypes. The mutation rate used for time calculation was  $7 \times 10^{-9}$ . Source data are provided as a Source Data file.

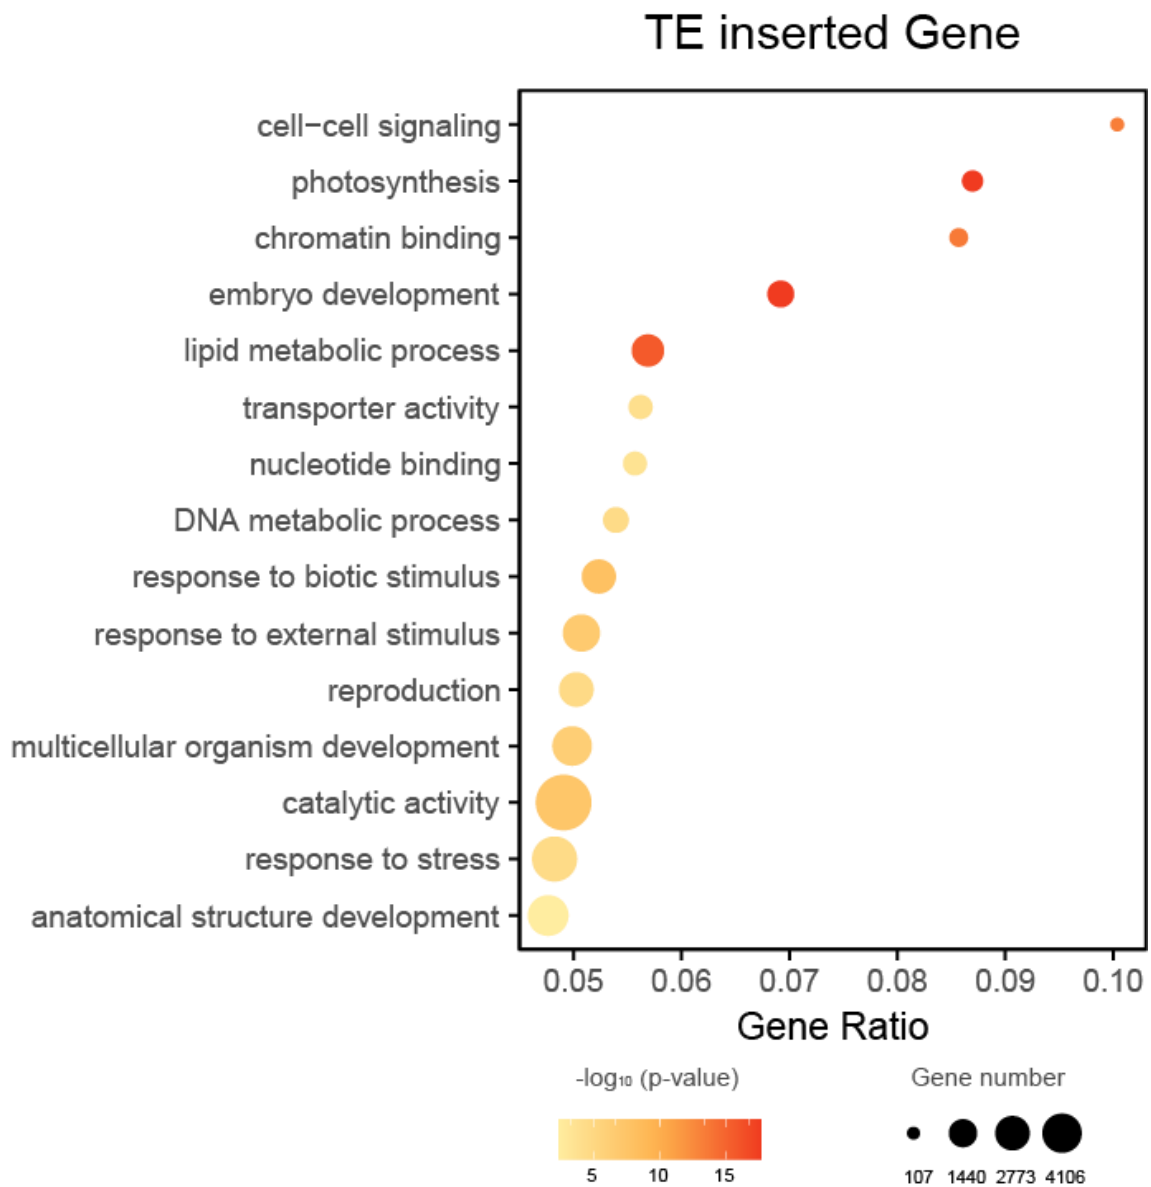

**Supplementary Fig. 11. Bubble chart of GO enrichment analysis for TE inserted genes.** Source data are provided as a Source Data file.

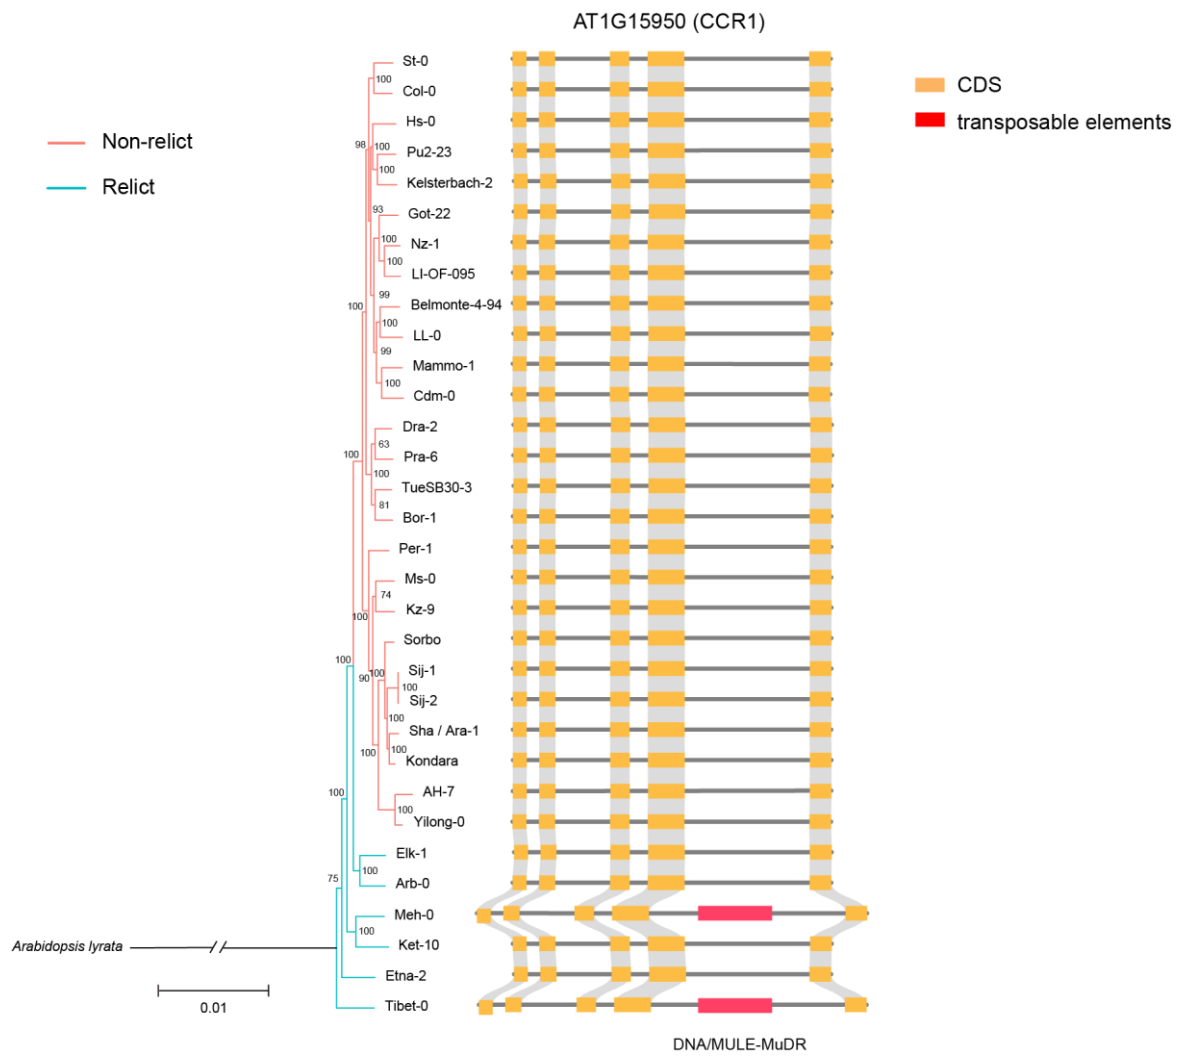

**Supplementary Fig. 12.** *AT1G15950 (CCR1)* gene structure in *Arabidopsis thaliana* ecotypes genomes. Only Tibet-0 and Meh-0 have a DNA transposon insertion in the fourth intron region.

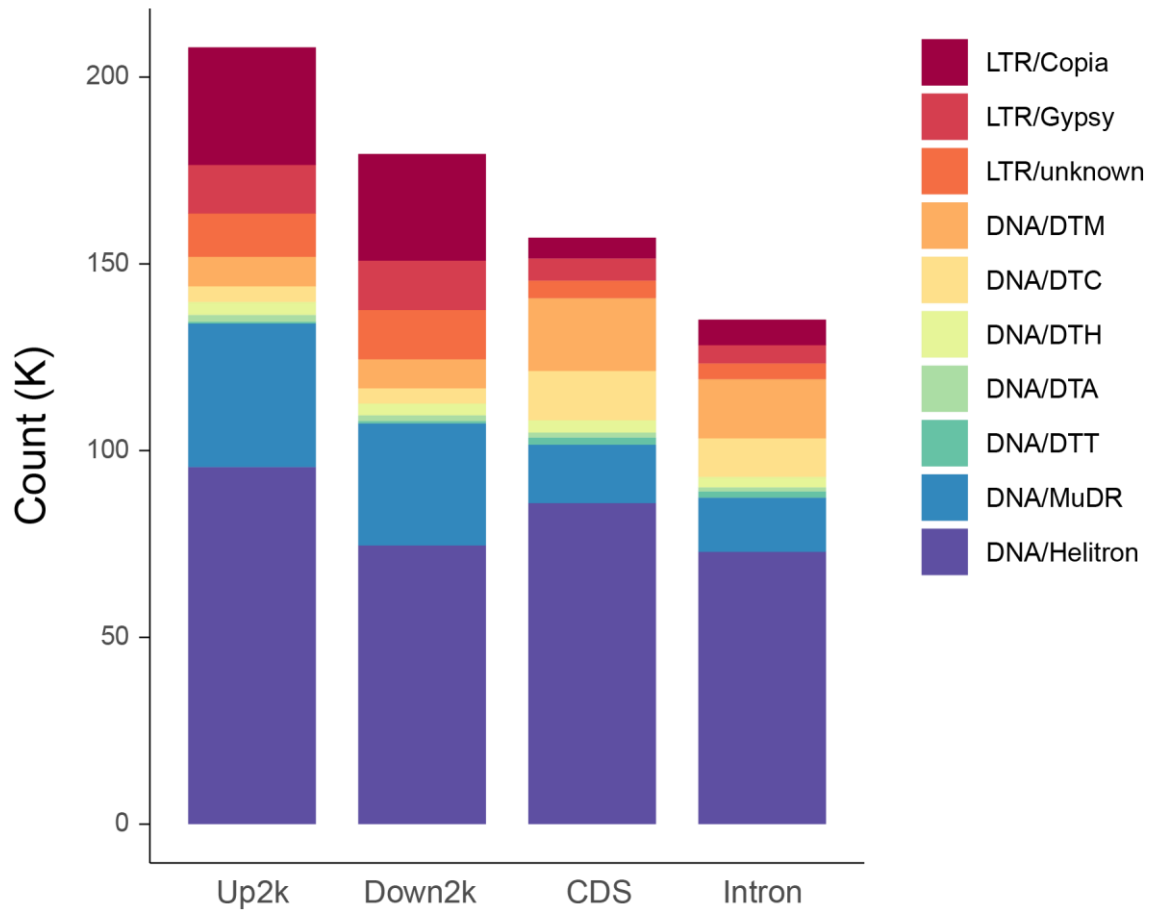

**Supplementary Fig. 13. Composition of different TE types inserted around genes.**

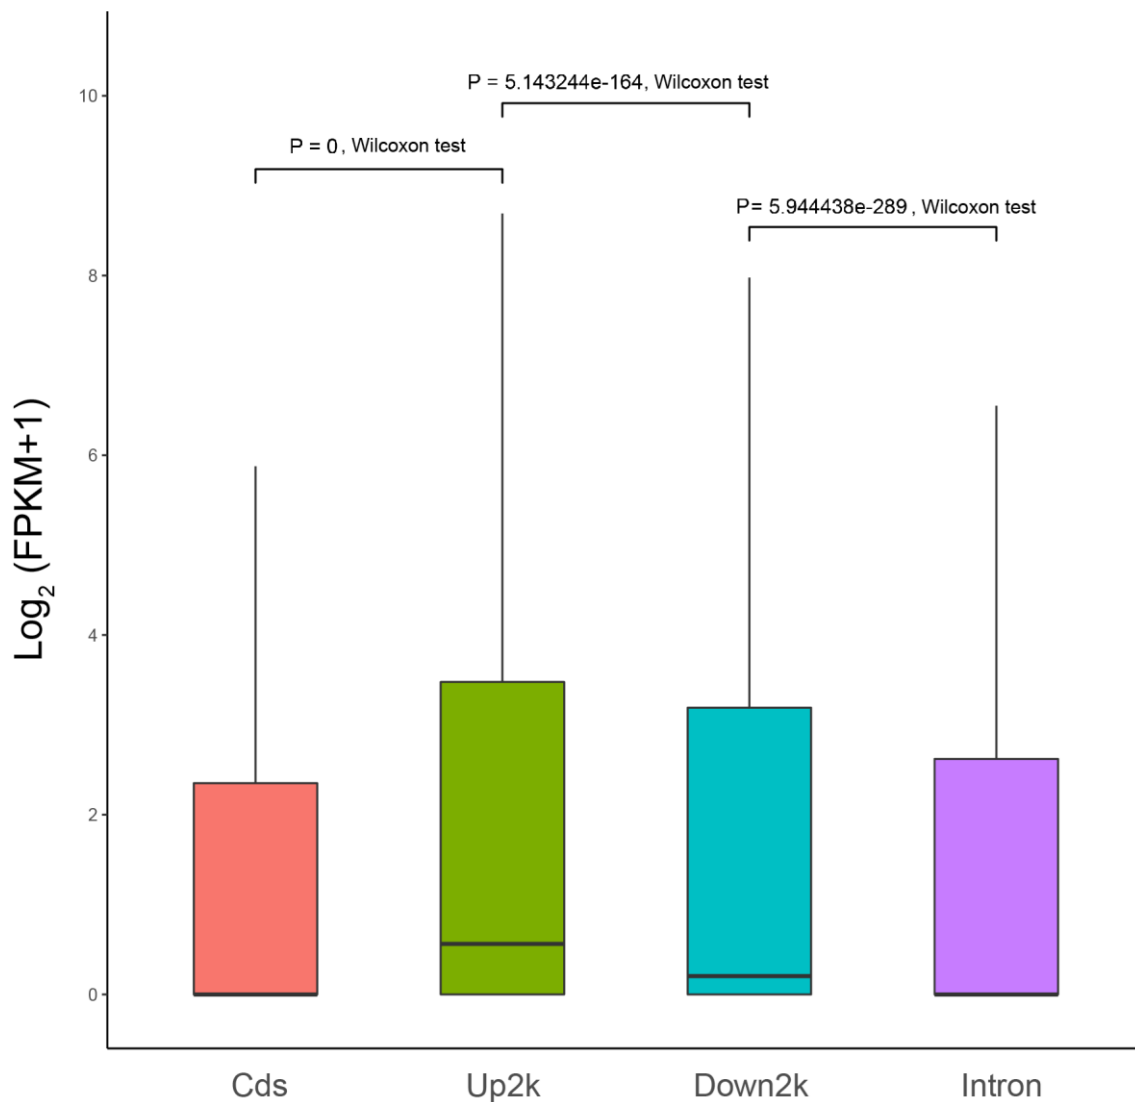

**Supplementary Fig. 14. The expression level of genes with TE inserted in different regions.** The middle line of the boxplot is the median, the lower and upper hinges correspond to the first and third quartiles, the upper whisker extends from the hinge to the largest value no further than  $1.5 \times \text{IQR}$  from the hinge (where IQR is the inter-quartile range) and the lower whisker extends from the hinge to the smallest value at most  $1.5 \times \text{IQR}$  of the hinge, the outliers are removed. Significance tested by two tailed Wilcoxon method ( $p = 0, 5.143244\text{e-}164$  and  $5.944438\text{e-}289$ ).

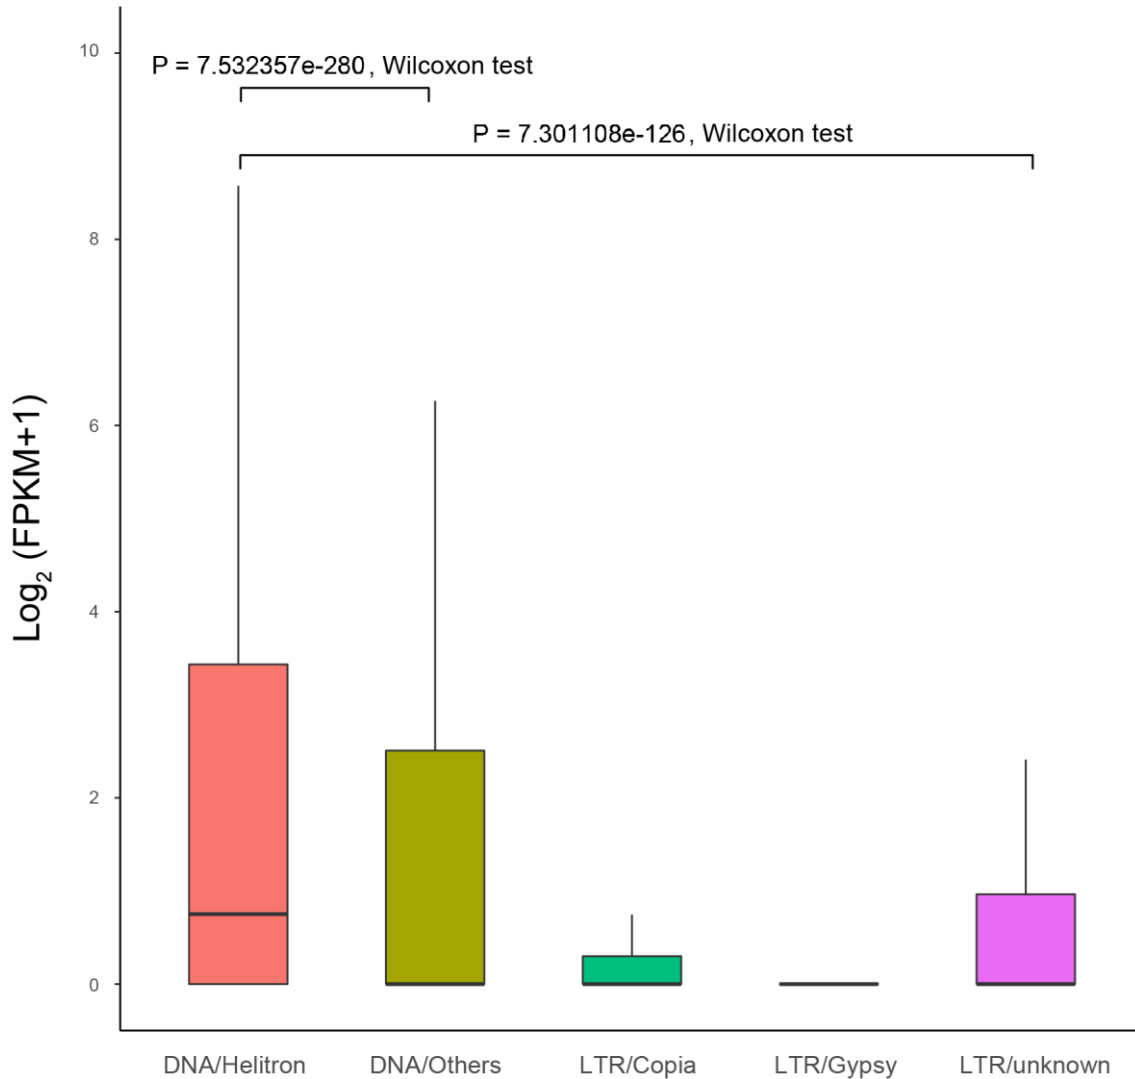

**Supplementary Fig. 15. The expression level of genes with different TE types' insertion.** The middle line of the boxplot is the median, the lower and upper hinges correspond to the first and third quartiles, the upper whisker extends from the hinge to the largest value no further than  $1.5 \times \text{IQR}$  from the hinge (where IQR is the inter-quartile range) and the lower whisker extends from the hinge to the smallest value at most  $1.5 \times \text{IQR}$  of the hinge, the outliers are removed. Significance two tailed tested by Wilcoxon method ( $p = 7.532357e-280$  and  $7.301108e-126$ ).



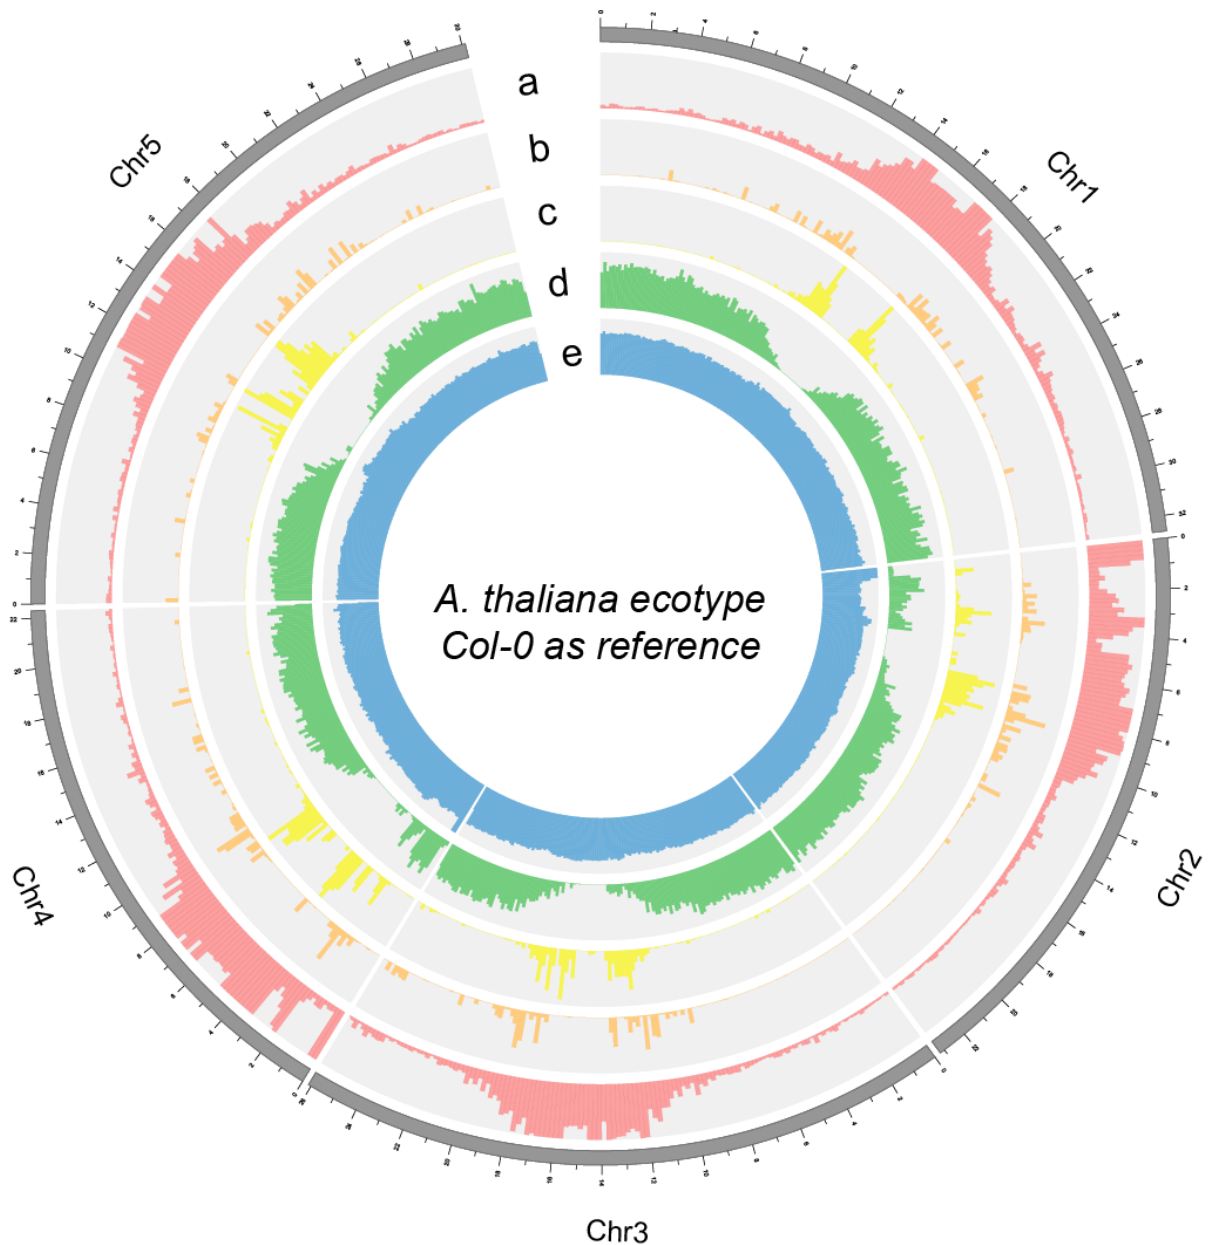

**Supplementary Fig. 16. Circos plot of the reference genome Col-0.** a. all TE distribution across the whole genome; b. LTR/Copia distribution across the whole genome; c. LTR/Gypsy distribution across the whole genome; d. gene density of the Col-0 genome; e. GC density of the Col-0 genome.

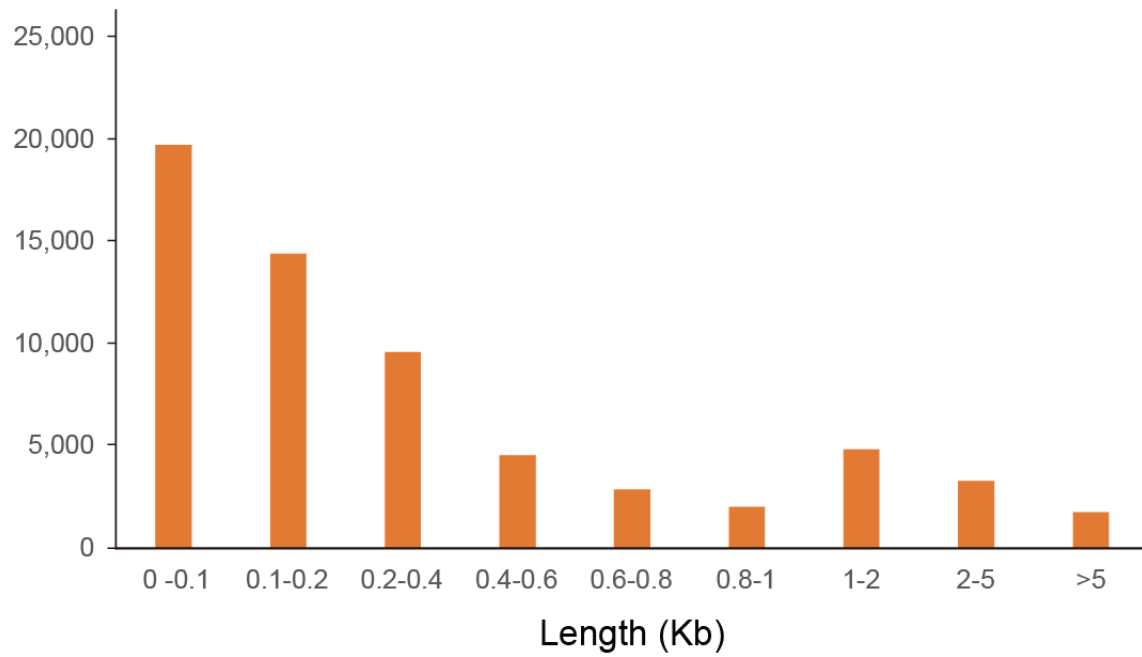

**Supplementary Fig. 17. Distribution of the SVs length in graph-based pan-genome constructed by 32 *Arabidopsis thaliana* ecotype genomes.**

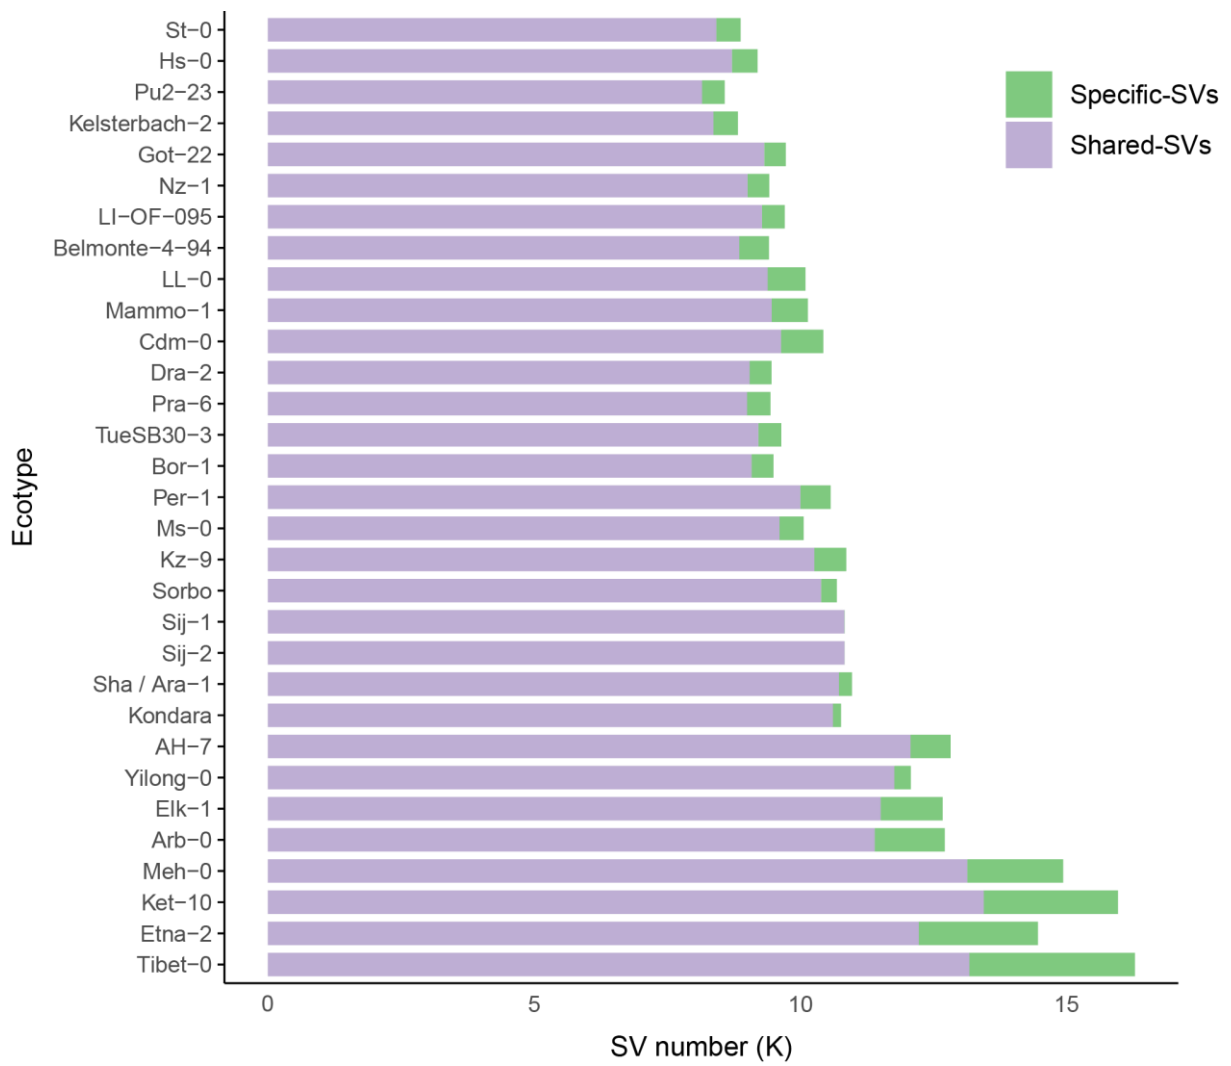

**Supplementary Fig. 18. Shared-SVs and ecotype-specific SVs in 32 *A. thaliana* genomes.** Blue rectangle displays relict ecotypes, while red rectangle displays non-relict ecotypes.

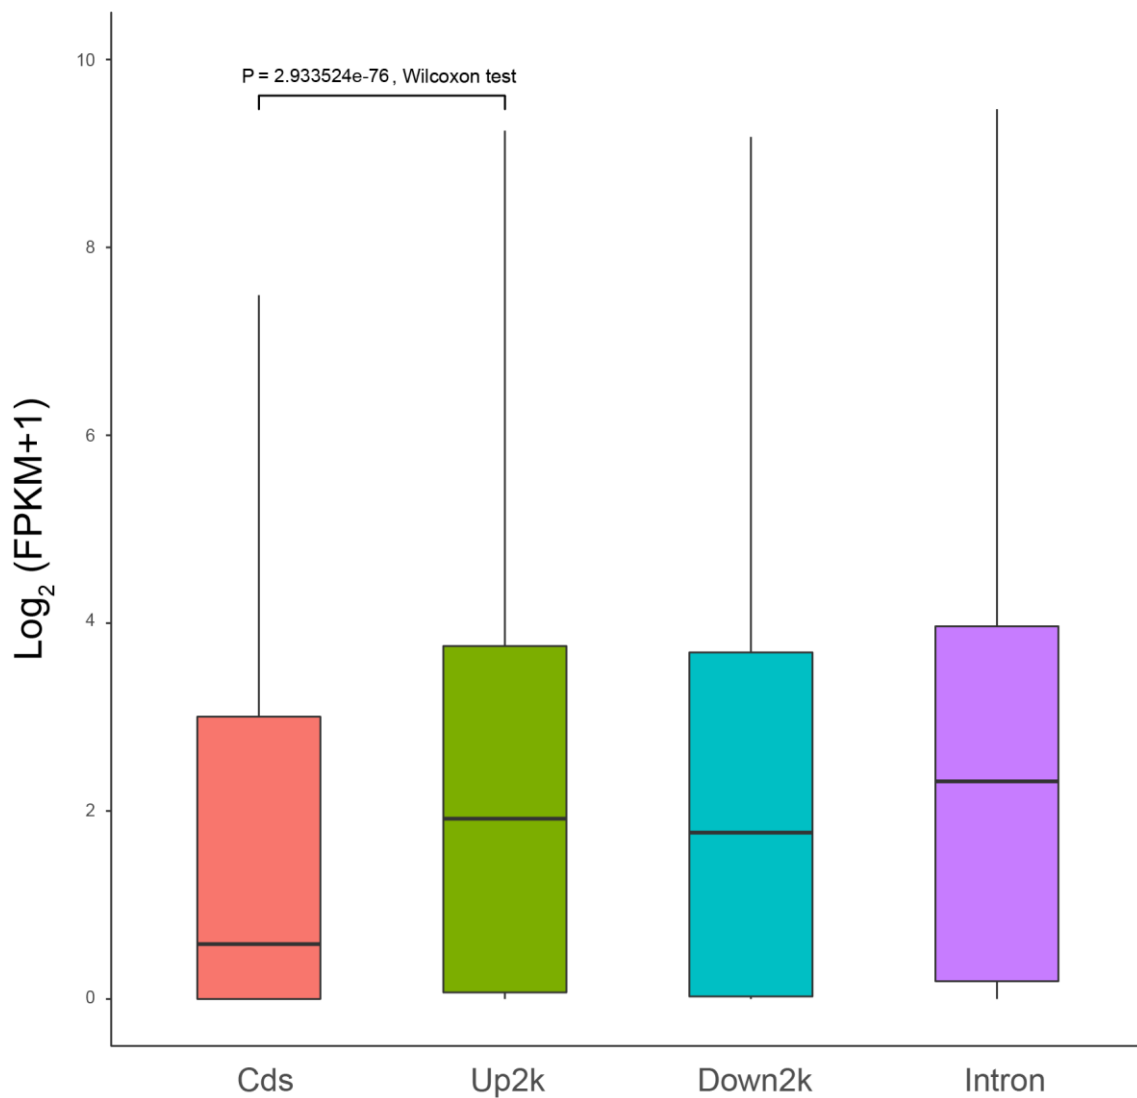

**Supplementary Fig. 19. The expression level of genes with SV overlapped in different regions.** The middle line of the boxplot is the median, the lower and upper hinges correspond to the first and third quartiles, the upper whisker extends from the hinge to the largest value no further than  $1.5 \times \text{IQR}$  from the hinge (where IQR is the inter-quartile range) and the lower whisker extends from the hinge to the smallest value at most  $1.5 \times \text{IQR}$  of the hinge, the outliers are removed. Significance tested by two tailed Wilcoxon method ( $p = 2.933524e-76$ ).

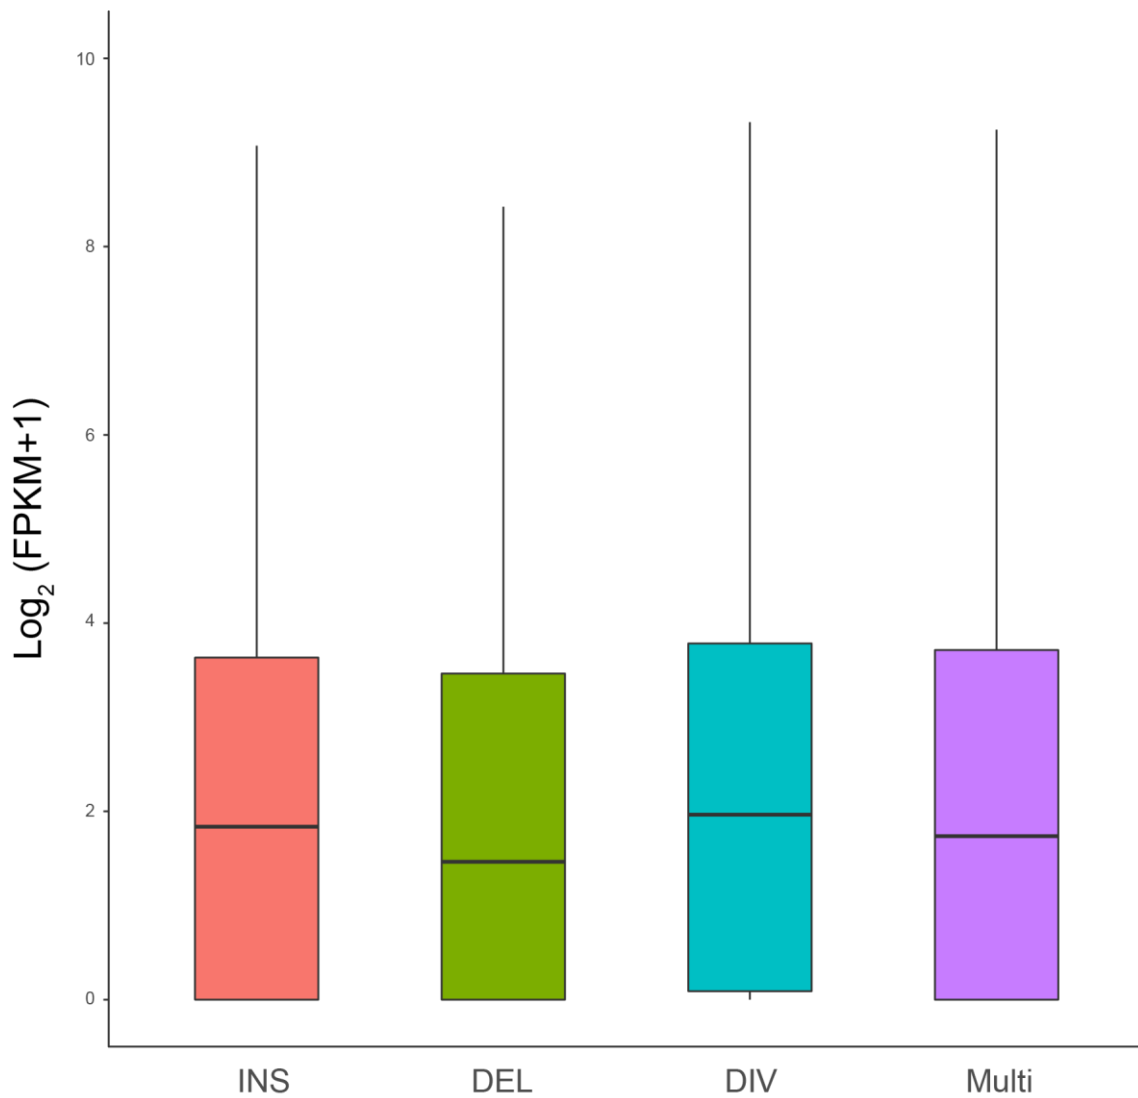

**Supplementary Fig. 20. The expression level of genes overlapped with different SV types.** The middle line of the boxplot is the median, the lower and upper hinges correspond to the first and third quartiles, the upper whisker extends from the hinge to the largest value no further than  $1.5 \times \text{IQR}$  from the hinge (where IQR is the inter-quartile range) and the lower whisker extends from the hinge to the smallest value at most  $1.5 \times \text{IQR}$  of the hinge, the outliers are removed. Significance tested by two tailed Wilcoxon method.

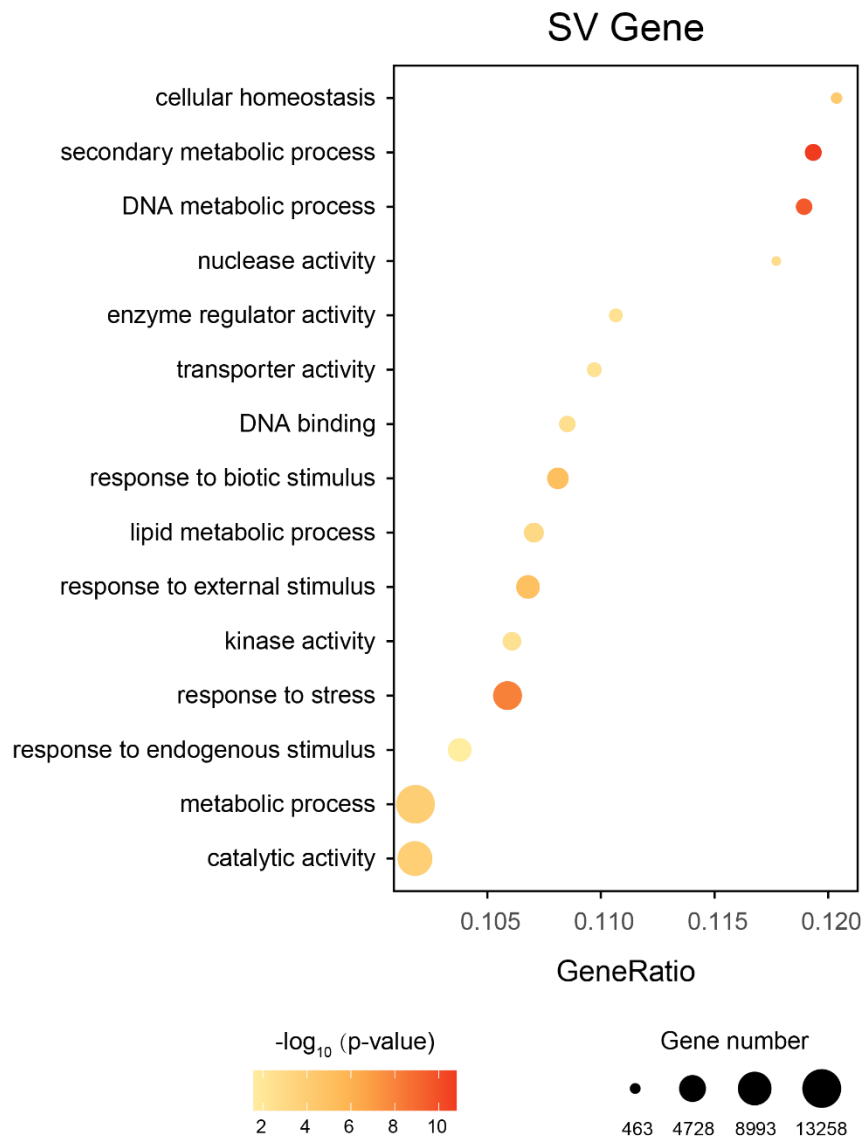

**Supplementary Fig. 21. Bubble chart of GO enrichment analysis for SV overlapped genes.**

## SV Hotspots Gene

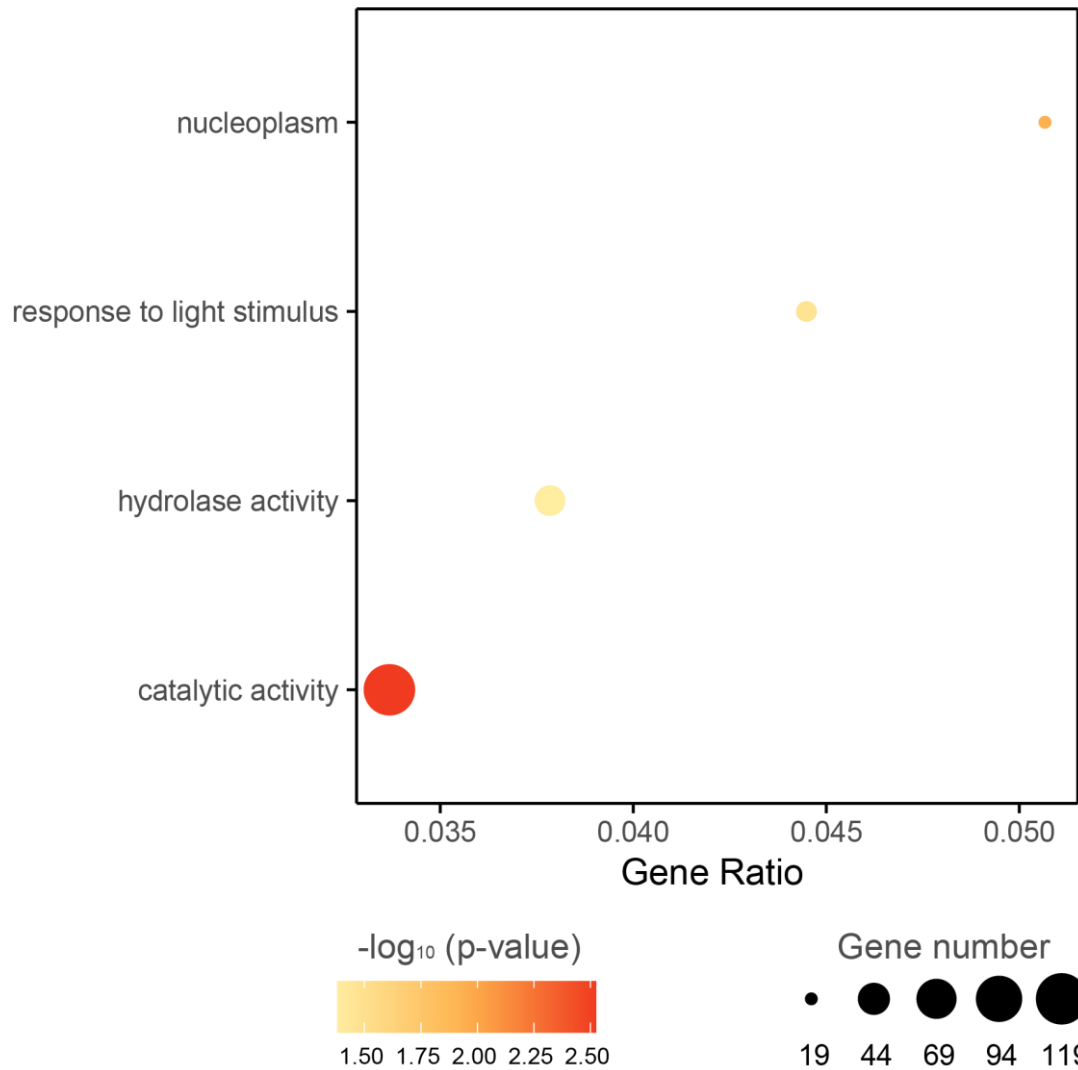

**Supplementary Fig. 22. Bubble chart of GO enrichment analysis for genes in SV hotspot region.**

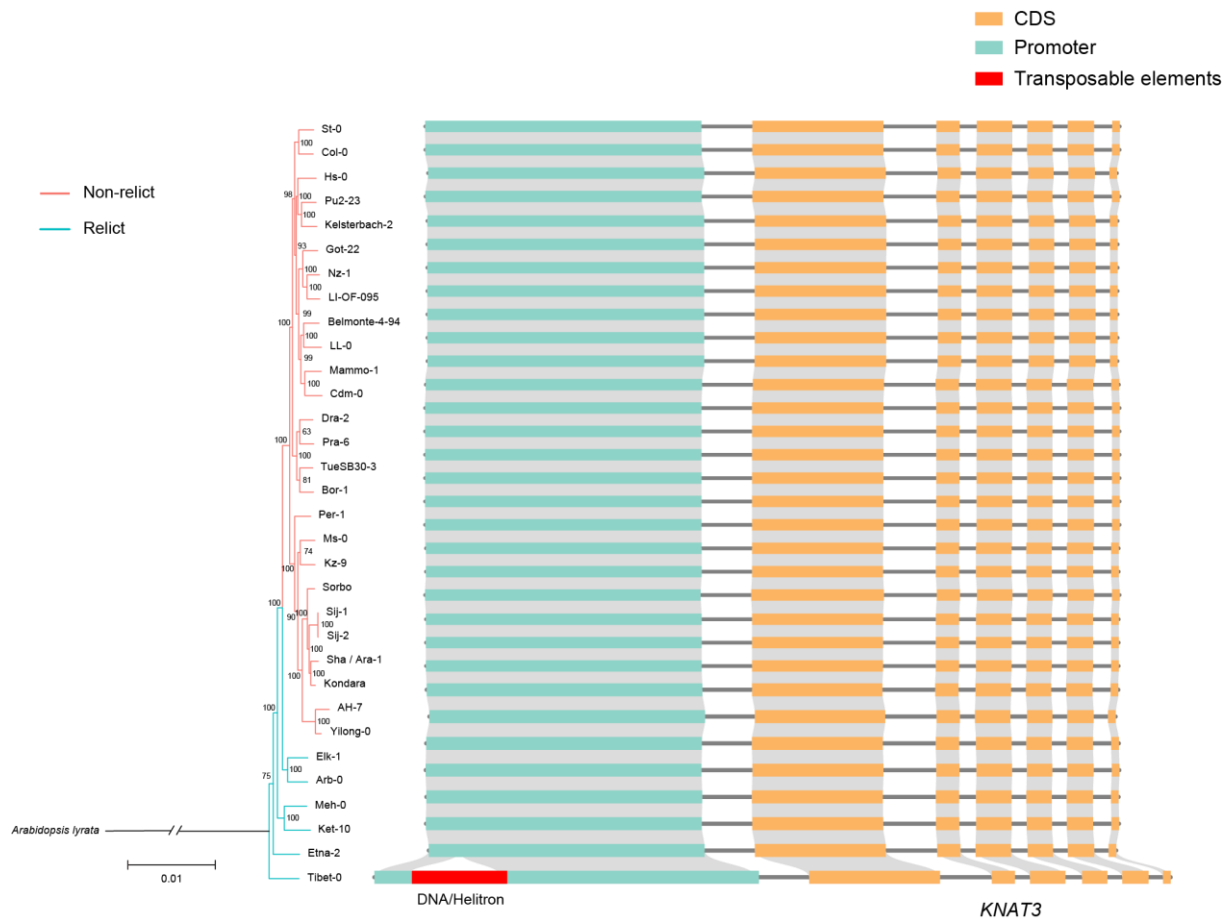

**Supplementary Fig. 23. *AT5G25220 (KNAT3)* gene structure in *Arabidopsis thaliana* ecotypes genomes. Only Tibet-0 have a DNA transposon insertion in the promoter region.**



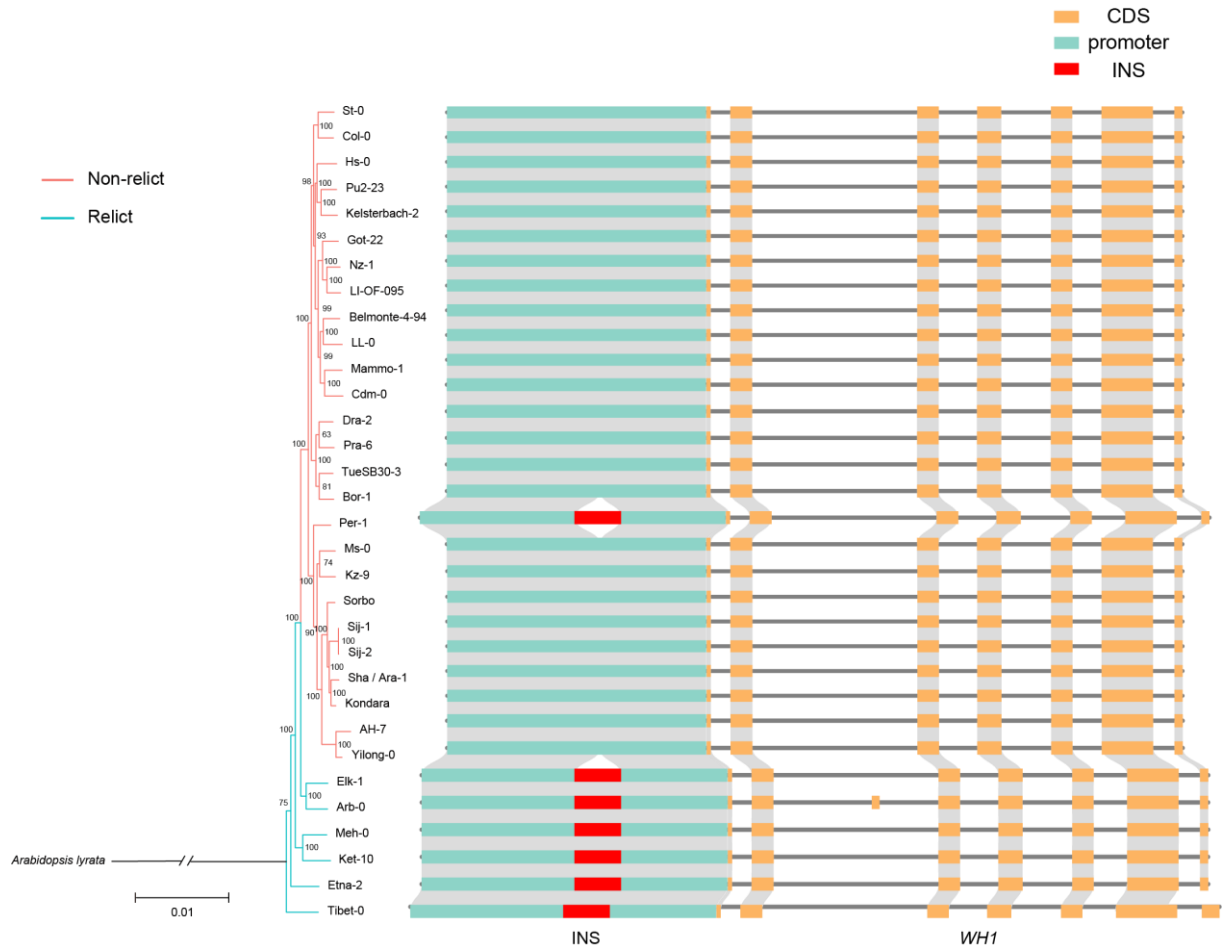

**Supplementary Fig. 24.** *AT1G54260 (WH1)* gene structure in *Arabidopsis thaliana* ecotypes genomes. Only 6 relict ecotypes and Per-1 have a 180 bp insertion in the promoter region.

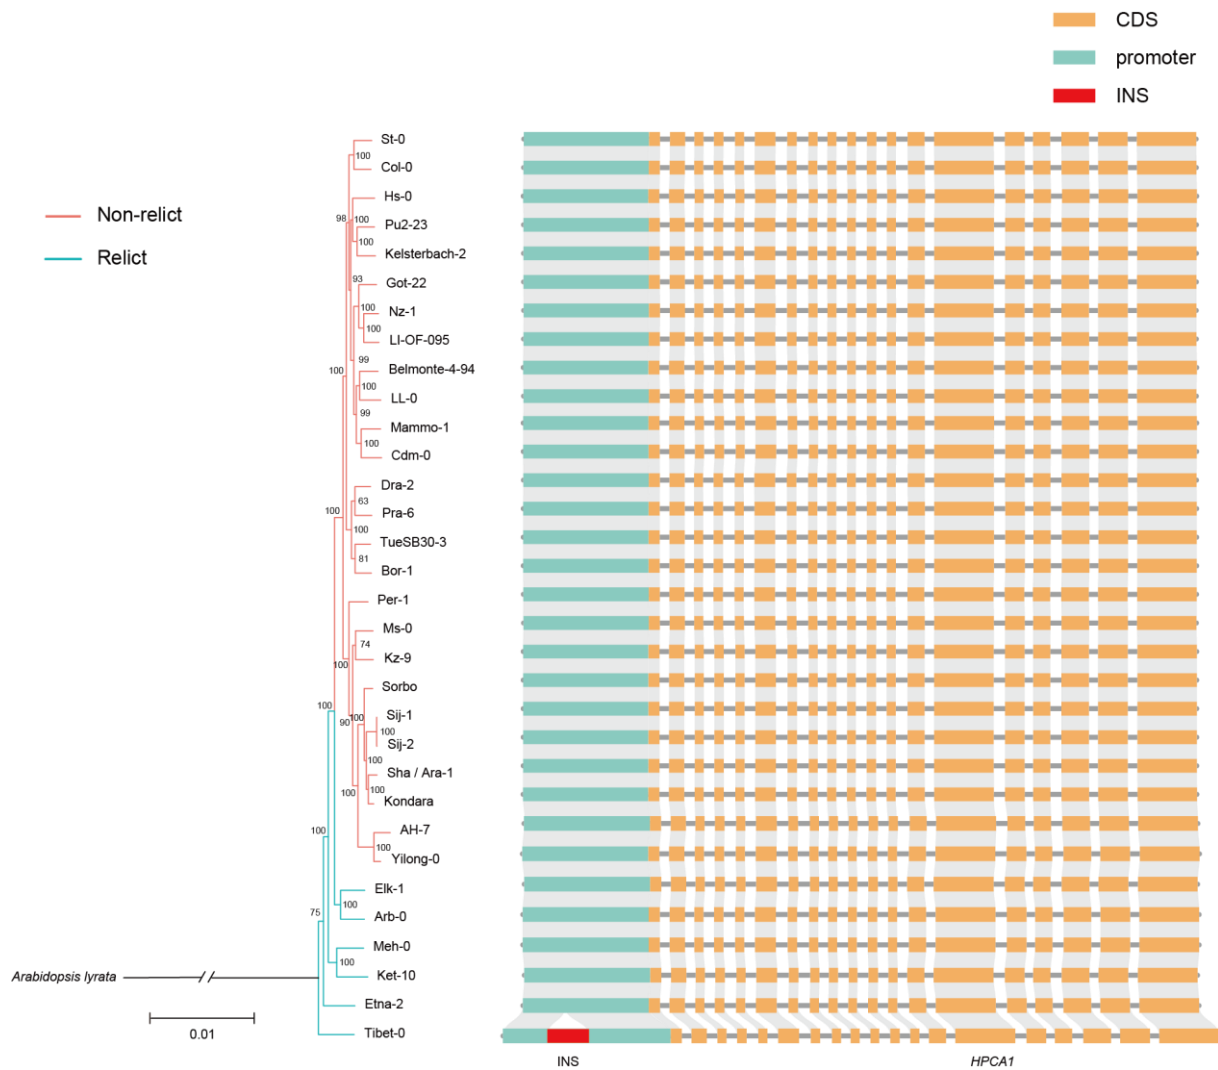

**Supplementary Fig. 25. *AT5G49760* (*HPCA1*) gene structure in *Arabidopsis thaliana* ecotypes genomes. Only Tibet-0 have a 332 bp TE insertion in the promoter region.**

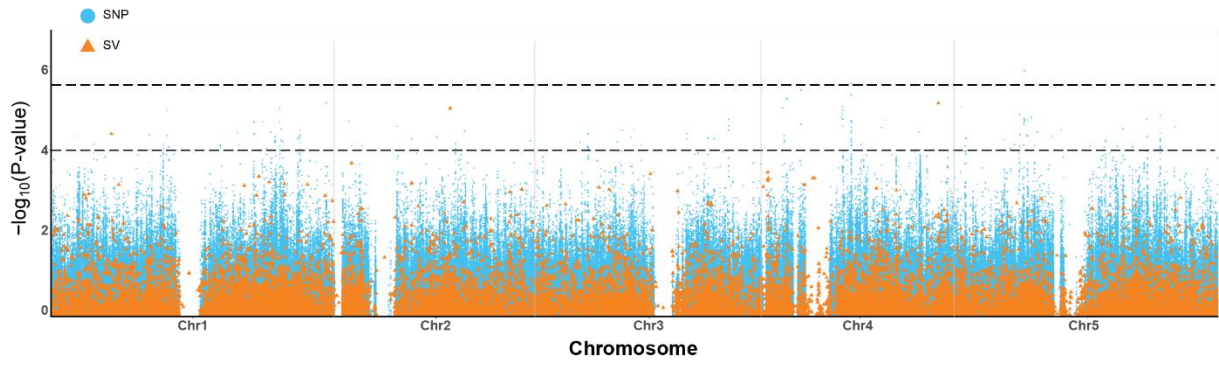

**Supplementary Fig. 26. Manhattan plot of SV-GWAS (orange) and SNP-GWAS (blue) for Leaf As75 traits with detected association peaks.** The dashed black lines were genome wide significance threshold for SNP-GWAS (upper, 5.80) and SV-GWAS (lower, 4.17). Significance was tested by standard linear mixed model.

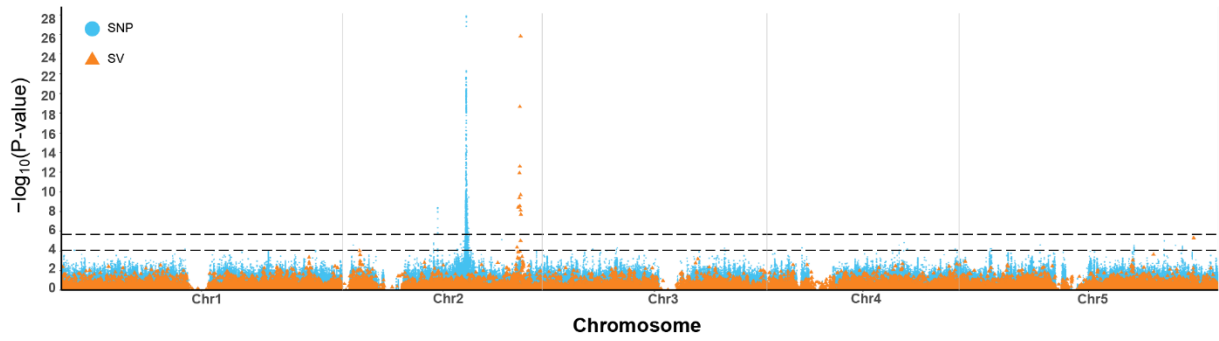

**Supplementary Fig. 27. Manhattan plot of SV-GWAS (orange) and SNP-GWAS (blue) for Leaf Mo98 traits with detected association peaks.** The dashed black lines were genome wide significance threshold for SNP-GWAS (upper, 5.80) and SV-GWAS (lower, 4.17). Significance was tested by standard linear mixed model.

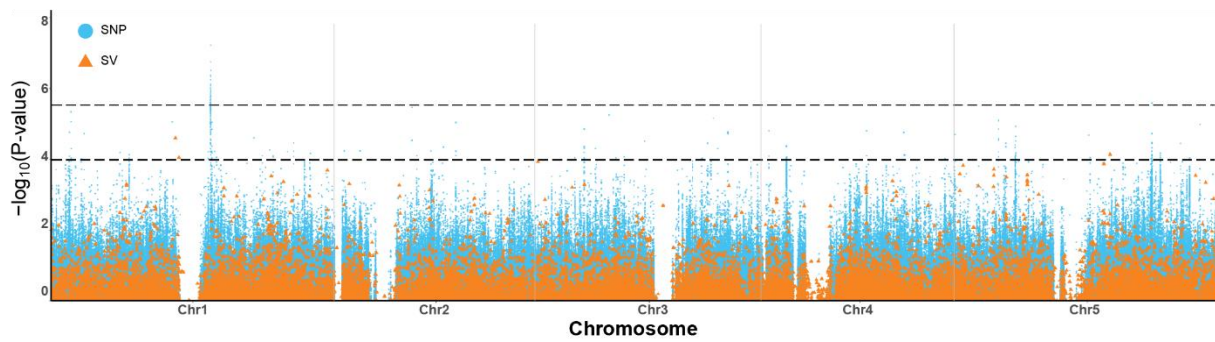

**Supplementary Fig. 28. Manhattan plot of SV-GWAS (orange) and SNP-GWAS (blue) for Leaf P31 traits with detected association peaks.** The dashed black lines were genome wide significance threshold for SNP-GWAS (upper, 5.80) and SV-GWAS (lower, 4.17). Significance was tested by standard linear mixed model.

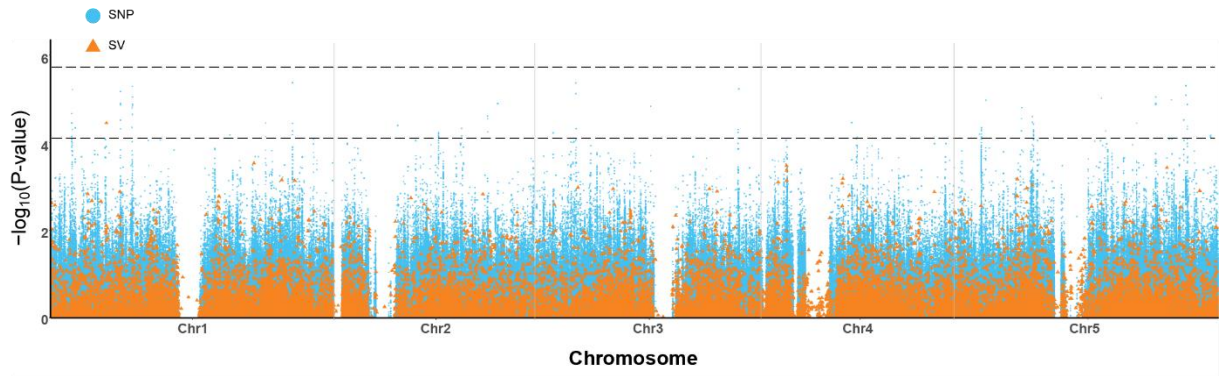

**Supplementary Fig. 29. Manhattan plot of SV-GWAS (orange) and SNP-GWAS (blue) for Leaf S34 traits with detected association peaks.** The dashed black lines were genome wide significance threshold for SNP-GWAS (upper, 5.80) and SV-GWAS (lower, 4.17). Significance was tested by standard linear mixed model.

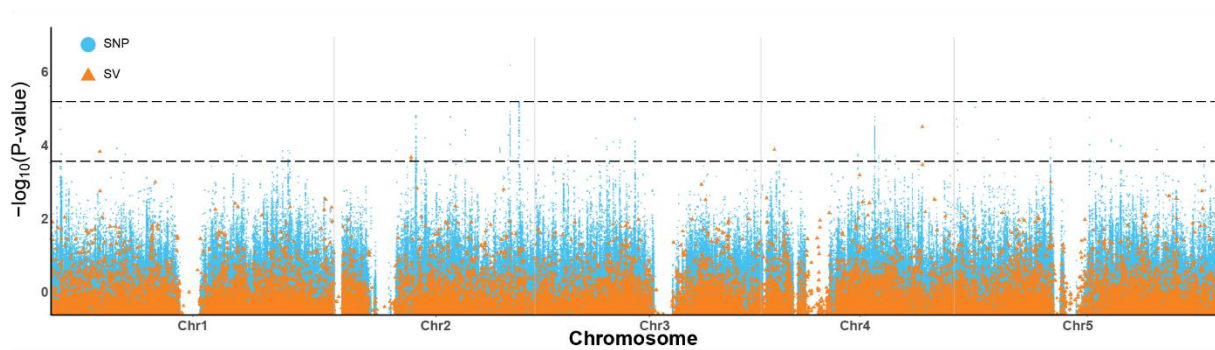

**Supplementary Fig. 30. Manhattan plot of SV-GWAS (orange) and SNP-GWAS (blue) for Leaf Sr88 traits with detected association peaks.** The dashed black lines were genome wide significance threshold for SNP-GWAS (upper, 5.80) and SV-GWAS (lower, 4.17). Significance was tested by standard linear mixed model.

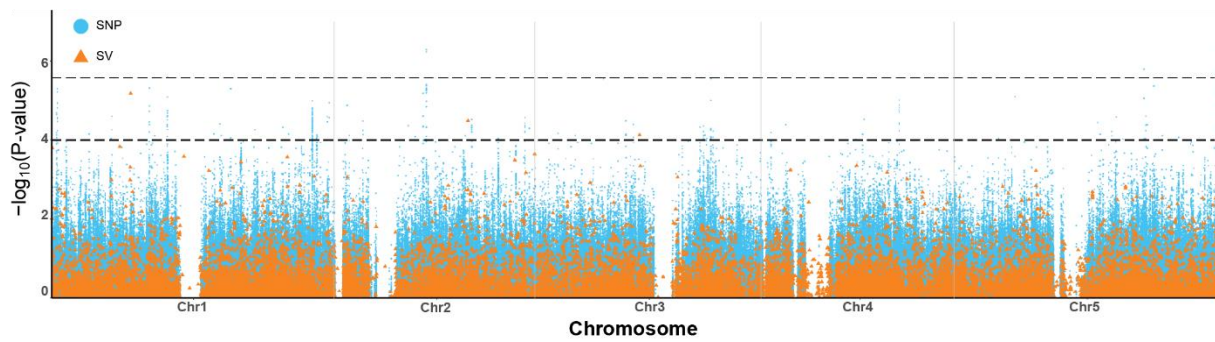

**Supplementary Fig. 31. Manhattan plot of SV-GWAS (orange) and SNP-GWAS (blue) for Seed Ca43 traits with detected association peaks.** The dashed black lines were genome wide significance threshold for SNP-GWAS (upper, 5.80) and SV-GWAS (lower, 4.17). Significance was tested by standard linear mixed model.



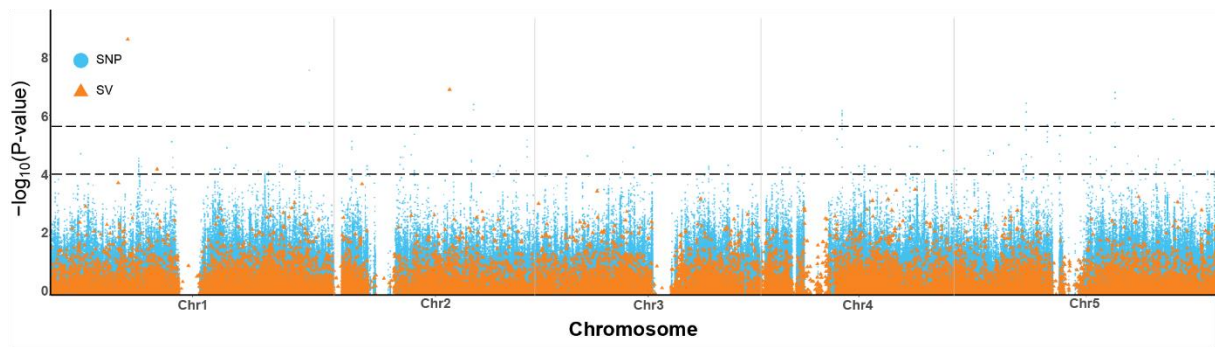

**Supplementary Fig. 32. Manhattan plot of SV-GWAS (orange) and SNP-GWAS (blue) for Seed Cd114 traits with detected association peaks.** The dashed black lines were genome wide significance threshold for SNP-GWAS (upper, 5.80) and SV-GWAS (lower, 4.17). Significance was tested by standard linear mixed model.

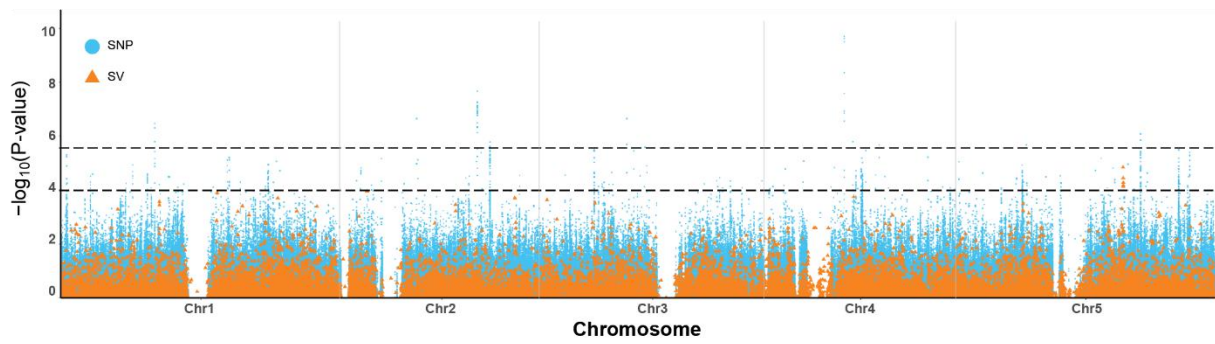

**Supplementary Fig. 33. Manhattan plot of SV-GWAS (orange) and SNP-GWAS (blue) for Seed Mg25 traits with detected association peaks.** The dashed black lines were genome wide significance threshold for SNP-GWAS (upper, 5.80) and SV-GWAS (lower, 4.17). Significance was tested by standard linear mixed model.

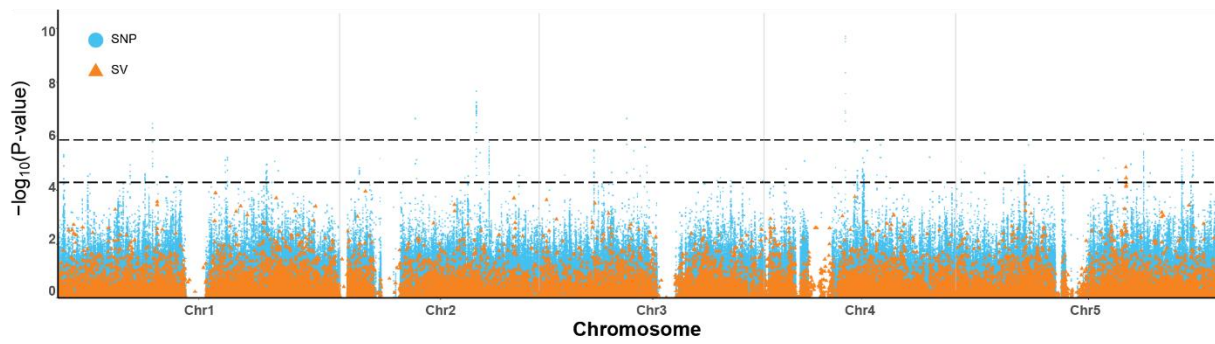

**Supplementary Fig. 34. Manhattan plot of SV-GWAS (orange) and SNP-GWAS (blue) for Seed Mn55 traits with detected association peaks.** The dashed black lines were genome wide significance threshold for SNP-GWAS (upper, 5.80) and SV-GWAS (lower, 4.17). Significance was tested by standard linear mixed model.

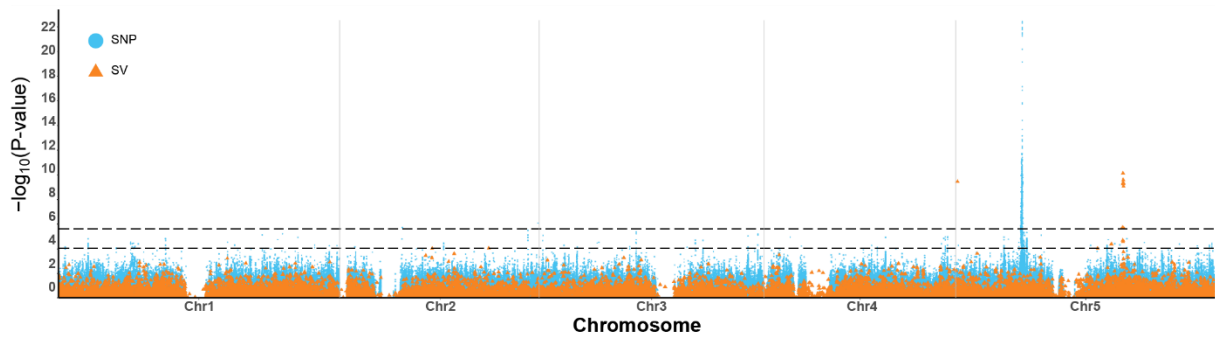

**Supplementary Fig. 35. Manhattan plot of SV-GWAS (orange) and SNP-GWAS (blue) for Seed Se82 traits with detected association peaks.** The dashed black lines were genome wide significance threshold for SNP-GWAS (upper, 5.80) and SV-GWAS (lower, 4.17). Significance was tested by standard linear mixed model.

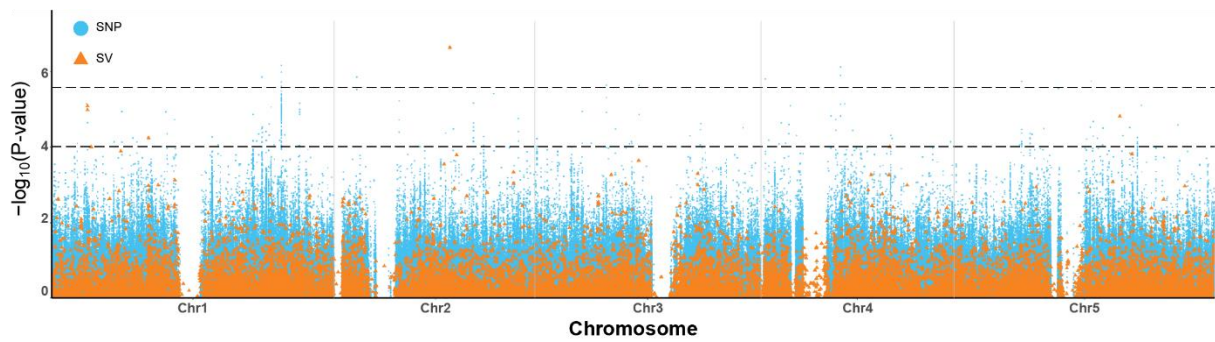

**Supplementary Fig. 36. Manhattan plot of SV-GWAS (orange) and SNP-GWAS (blue) for Seed Zn66 traits with detected association peaks.** The dashed black lines were genome wide significance threshold for SNP-GWAS (upper, 5.80) and SV-GWAS (lower, 4.17). Significance was tested by standard linear mixed model.
