# Supplementary material for: The pan-genome and local adaptation of Arabidopsis thaliana
Source: PubMed Central journal article supplement (PMC10558531; doi:10.1038/s41467-023-42029-4), 2023-10-06
Supplement: 41467_2023_42029_MOESM3_ESM.pdf [file 41467_2023_42029_MOESM3_ESM.pdf]

### **Description of Additional Supplementary Files**

File Name: Supplementary Data 1

Description: Variance component analysis for 61 traits with SNPs and SVs.

File Name: Supplementary Data 2

Description: Summary of the SV-GWAS results and genes around 20kb. Significance was tested by standard linear mixed model.

File Name: Supplementary Data 3

Description: Primers used in the LUC experiment.
